# Supplementary material for: Practical and scalable one-pot synthesis of arbekacin
Source: Royal Society of Chemistry journal article supplement (doi:10.1039/d3re00598d), 2024-01-01
Supplement: d3re00598d1.pdf [file d3re00598d1.pdf]

# Supporting Information

## Practical and scalable one-pot synthesis of Arbekacin

Hongsen Zhang, Chunxiao Wang, Kai Liu, Chao Li\* and Renzhong Qiao\*

*State Key Laboratory of Chemical Resource Engineering, Beijing University of  
Chemical Technology, No. 15 Beisanhuan East Road, Beijing, 100029, China.*

Mailing address: No. 15 Beisanhuan East Road, Beijing, 100029, China

Tel. number: 86 10 64413899

E-mail: lichao@mail.buct.edu.cn; qiao\_group@163.com

### Contents

|                                                                                              |    |
|----------------------------------------------------------------------------------------------|----|
| 1. Density functional theory (DFT) calculation of Dibekacin.....                             | 2  |
| 1.1 Calculation of N-H bond length of Dibekacin molecule .....                               | 2  |
| 1.2 Fukui function calculation .....                                                         | 4  |
| 1.3 Bond dissociation energy calculation .....                                               | 6  |
| 1.4 Hydrogen bond interaction and conformational inversion speculation of Dibekacin<br>..... | 7  |
| 2. Scale-up experiment data .....                                                            | 8  |
| 3. NMR Spectra, HRMS and HPLC .....                                                          | 9  |
| 3.1 NMR Spectra.....                                                                         | 9  |
| 3.2 HRMS and analysis.....                                                                   | 26 |
| 3.3 HPLC-ELSD .....                                                                          | 31 |
| 4. Optical rotary power.....                                                                 | 37 |
| 5. References.....                                                                           | 38 |

# 1. Density functional theory (DFT) calculation of Dibekacin

## 1.1 Calculation of N-H bond length of Dibekacin molecule

All calculations were performed in the gas phase using the density functional theory (DFT) calculation method. The Gaussian 09 software was utilized to optimize the structure of Dibekacin and minimize its energy value, employing B3LYP/6-31G (d, p) as the basis set. Subsequently, the N-H bond length of the amino group of Dibekacin was determined.

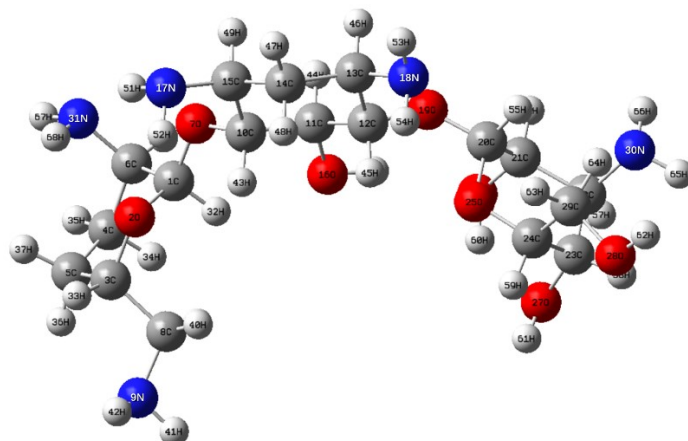

**Fig. S1.** Ball-and-stick model and atomic number of Dibekacin molecule

**Table S1.** N-H bond length of Dibekacin molecule

|     | Bond name | Bond length (pm) |
|-----|-----------|------------------|
| 9N  | 9N-41H    | 1.03480          |
|     | 9N-42H    | 1.03489          |
| 17N | 17N-51H   | 1.03535          |
|     | 17N-52H   | 1.03492          |
| 18N | 18N-53H   | 1.03470          |
|     | 18N-54H   | 1.03503          |
| 30N | 30N-65H   | 1.03482          |
|     | 30N-66H   | 1.03470          |
| 31N | 31N-67H   | 1.03535          |
|     | 31N-68H   | 1.03500          |

### Cartesian coordinates for the stationary points

|   |         |        |         |
|---|---------|--------|---------|
| C | -3.3375 | 2.0155 | -1.2198 |
| O | -3.3294 | 3.3521 | -0.7638 |
| C | -4.2773 | 3.6121 | 0.235   |
| C | -5.7978 | 1.9042 | -0.8592 |
| C | -5.6926 | 3.3136 | -0.265  |
| C | -4.669  | 1.6906 | -1.8762 |
| O | -2.3082 | 1.9772 | -2.1867 |
| C | -3.9163 | 2.9354 | 1.5615  |
| N | -4.7038 | 3.4978 | 2.6715  |
| C | -1.014  | 1.909  | -1.6447 |
| C | -0.489  | 0.4818 | -1.6715 |

|   |         |         |         |
|---|---------|---------|---------|
| C | 0.9547  | 0.3574  | -1.183  |
| C | 1.8826  | 1.2857  | -1.9752 |
| C | 1.3363  | 2.7251  | -1.9921 |
| C | -0.1046 | 2.7851  | -2.508  |
| O | -1.2776 | -0.3425 | -0.8444 |
| N | -0.6047 | 4.1718  | -2.4698 |
| N | 3.2272  | 1.3652  | -1.3732 |
| O | 1.235   | -1.0119 | -1.3214 |
| C | 2.4612  | -1.4977 | -0.824  |
| C | 2.4626  | -3.0075 | -0.9517 |
| C | 3.7189  | -3.6011 | -0.324  |
| C | 3.8884  | -3.0487 | 1.0893  |
| C | 3.7181  | -1.5355 | 1.1698  |
| O | 2.5416  | -1.1207 | 0.5298  |
| O | 1.3334  | -3.5425 | -0.2969 |
| O | 2.9111  | -3.6424 | 1.9152  |
| O | 6.0393  | -1.0415 | 1.5348  |
| C | 4.9211  | -0.7068 | 0.7377  |
| N | 4.8976  | -3.2953 | -1.1507 |
| N | -4.8727 | 2.5571  | -3.052  |
| H | -3.1171 | 1.3054  | -0.3966 |
| H | -4.2103 | 4.715   | 0.4208  |
| H | -5.7181 | 1.1438  | -0.0472 |
| H | -6.7927 | 1.7568  | -1.3417 |
| H | -6.4366 | 3.4435  | 0.555   |
| H | -5.9626 | 4.056   | -1.0544 |
| H | -4.6782 | 0.6293  | -2.2255 |
| H | -4.0936 | 1.8373  | 1.5332  |
| H | -2.8365 | 3.0973  | 1.79    |
| H | -4.4106 | 3.0747  | 3.5692  |
| H | -4.5136 | 4.5098  | 2.7748  |
| H | -0.9943 | 2.303   | -0.6023 |
| H | -0.5723 | 0.0734  | -2.7064 |
| H | 0.9731  | 0.6411  | -0.1049 |
| H | 1.9808  | 0.9149  | -3.0235 |
| H | 1.9868  | 3.3695  | -2.6306 |
| H | 1.3713  | 3.1478  | -0.9597 |
| H | -0.1361 | 2.4379  | -3.5692 |
| H | -0.8733 | -1.2152 | -0.8238 |
| H | -1.587  | 4.1927  | -2.7963 |
| H | -0.6473 | 4.5148  | -1.4943 |
| H | 3.7741  | 2.1229  | -1.8175 |
| H | 3.1579  | 1.6303  | -0.3751 |
| H | 3.2918  | -1.0742 | -1.4216 |
| H | 2.3837  | -3.3066 | -2.0236 |
| H | 3.6404  | -4.715  | -0.2935 |
| H | 4.8688  | -3.368  | 1.5109  |
| H | 3.5654  | -1.2818 | 2.2511  |
| H | 1.4327  | -3.4123 | 0.6496  |
| H | 3.1925  | -3.6075 | 2.8314  |
| H | 6.7927  | -0.5108 | 1.2667  |
| H | 4.7326  | 0.3803  | 0.8872  |
| H | 5.2213  | -0.8614 | -0.3182 |
| H | 5.7483  | 3.7164  | -0.7386 |
| H | 4.8053  | -3.7311 | -2.0846 |
| H | -5.874  | 2.5907  | -3.3106 |
| H | -4.6132 | 3.5332  | -2.8259 |

## 1.2 Fukui function calculation

All calculations were performed in the gas phase using Gaussian 09 software at the B3LYP/6-31G (d, p) theoretical level. The charge distribution of natural atoms was calculated at 298K. To assess the degree of unpaired spin and charge at each site of the Dibekacin molecule, the electron spin density based on natural bond orbital (NBO) analysis was utilized. The regioselectivity of Dibekacin molecules was explained using the Fukui index.

Fukui function is defined as:

$$f(r) = \left[ \frac{\partial \rho(r)}{\partial N} \right]_v$$

In the formula,  $\rho(r)$  represents the electron density at the point  $r$  in space.  $N$  denotes the number of electrons in the system, and the constant term  $v$  in the partial derivative represents the external potential. The condensed version of the Fukui function utilizes the atomic number to quantify the distribution of electron density around the atom. The concentrated Fukui function can be calculated as follows:

$$\text{Nucleophilic attack: } f_k^+ = q_N^k - q_{N+1}^k$$

$$\text{Electrophilic attack: } f_k^- = q_{N-1}^k - q_N^k$$

$$\text{Radical attack : } f_k^0 = (q_{N-1}^k - q_{N+1}^k) \div 2$$

Where  $q_N^k$  is the atomic charge of  $k$  atom in the corresponding state. One of the most suitable methods for calculating the Fukui index is the natural population analysis (NPA) charge, which is used to study the reaction sites.<sup>3</sup> Microsoft Excel 2019 is used to sort the calculated values, and the results are shown in Table S2:

**Table S2** : Natural Population Analysis (NPA) charge distribution on Dibekacin at different electron state and calculated Fukui index ( $f^-$ ) levels.

| Atom | Charge (+1)<br>( $e/\text{\AA}^3$ ) | Charge (0)<br>( $e/\text{\AA}^3$ ) | Charge (-1)<br>( $e/\text{\AA}^3$ ) | $f^-$   |
|------|-------------------------------------|------------------------------------|-------------------------------------|---------|
| N31  | -0.90365                            | -0.89896                           | -0.73689                            | 0.16207 |
| N17  | -0.91523                            | -0.90851                           | -0.76145                            | 0.14706 |
| N18  | -0.91296                            | -0.91908                           | -0.82617                            | 0.09291 |
| N9   | -0.91654                            | -0.90834                           | -0.8495                             | 0.05884 |
| N30  | -0.93352                            | -0.92372                           | -0.86609                            | 0.05763 |
| H57  | 0.22674                             | 0.25398                            | 0.28187                             | 0.02789 |
| H67  | 0.35069                             | 0.37311                            | 0.40078                             | 0.02767 |
| H38  | 0.26053                             | 0.26931                            | 0.29549                             | 0.02618 |
| O26  | -0.77832                            | -0.76112                           | -0.73663                            | 0.02449 |
| H34  | 0.2329                              | 0.24103                            | 0.2625                              | 0.02147 |
| H49  | 0.25132                             | 0.25929                            | 0.27893                             | 0.01964 |
| H52  | 0.36451                             | 0.36958                            | 0.38893                             | 0.01935 |
| H53  | 0.36588                             | 0.38356                            | 0.40186                             | 0.0183  |
| H35  | 0.22228                             | 0.24991                            | 0.2681                              | 0.01819 |

|     |          |          |          |          |
|-----|----------|----------|----------|----------|
| H47 | 0.24669  | 0.26209  | 0.27941  | 0.01732  |
| H4  | 0.33224  | 0.3864   | 0.4034   | 0.017    |
| H36 | 0.26228  | 0.27668  | 0.29351  | 0.01683  |
| H65 | 0.334    | 0.38577  | 0.40233  | 0.01656  |
| H46 | 0.24874  | 0.25656  | 0.27279  | 0.01623  |
| H68 | 0.3683   | 0.38175  | 0.39754  | 0.01579  |
| O19 | -0.59683 | -0.58959 | -0.57395 | 0.01564  |
| H40 | 0.18472  | 0.21722  | 0.23249  | 0.01527  |
| H51 | 0.39543  | 0.40123  | 0.41549  | 0.01426  |
| H54 | 0.36154  | 0.37778  | 0.39172  | 0.01394  |
| H33 | 0.21304  | 0.24615  | 0.25995  | 0.0138   |
| H42 | 0.31463  | 0.37363  | 0.38703  | 0.0134   |
| H58 | 0.24148  | 0.25226  | 0.26556  | 0.0133   |
| H59 | 0.24842  | 0.2562   | 0.26913  | 0.01293  |
| H66 | 0.3026   | 0.38983  | 0.40247  | 0.01264  |
| H32 | 0.23973  | 0.23846  | 0.25077  | 0.01231  |
| H48 | 0.21853  | 0.2276   | 0.23981  | 0.01221  |
| H44 | 0.22911  | 0.23818  | 0.24971  | 0.01153  |
| H56 | 0.24064  | 0.25613  | 0.26752  | 0.01139  |
| O25 | -0.60081 | -0.59593 | -0.58458 | 0.01135  |
| H50 | 0.49649  | 0.49913  | 0.50924  | 0.01011  |
| H43 | 0.225    | 0.22731  | 0.23681  | 0.0095   |
| H61 | 0.37218  | 0.4877   | 0.49714  | 0.00944  |
| O28 | -0.77509 | -0.76761 | -0.75862 | 0.00899  |
| H62 | 0.41356  | 0.47682  | 0.48517  | 0.00835  |
| H45 | 0.24349  | 0.24369  | 0.25147  | 0.00778  |
| H39 | 0.22486  | 0.23874  | 0.24503  | 0.00629  |
| O16 | -0.77896 | -0.77562 | -0.76969 | 0.00593  |
| H37 | 0.20582  | 0.23805  | 0.24337  | 0.00532  |
| H60 | 0.48876  | 0.49758  | 0.50214  | 0.00456  |
| H55 | 0.24448  | 0.24734  | 0.25083  | 0.00349  |
| C10 | 0.03632  | 0.03774  | 0.04035  | 0.00261  |
| O7  | -0.56981 | -0.56343 | -0.56129 | 0.00214  |
| O27 | -0.7937  | -0.76832 | -0.76746 | 0.00086  |
| O2  | -0.60702 | -0.60539 | -0.6046  | 0.00079  |
| C20 | 0.34376  | 0.3436   | 0.34439  | 0.00079  |
| H63 | 0.16665  | 0.20756  | 0.20812  | 0.00056  |
| C4  | -0.49631 | -0.49965 | -0.49943 | 0.00022  |
| C11 | 0.05356  | 0.05218  | 0.05019  | -0.00199 |
| C29 | -0.15814 | -0.14838 | -0.15106 | -0.00268 |
| C21 | 0.02864  | 0.03114  | 0.02815  | -0.00299 |
| C5  | -0.51043 | -0.515   | -0.51831 | -0.00331 |
| C1  | 0.35504  | 0.35495  | 0.35095  | -0.004   |
| C12 | 0.03388  | 0.036    | 0.03199  | -0.00401 |

|     |          |          |          |          |
|-----|----------|----------|----------|----------|
| C23 | 0.00057  | 0.03469  | 0.03032  | -0.00437 |
| C24 | 0.02624  | 0.0204   | 0.01544  | -0.00496 |
| H64 | 0.22567  | 0.243    | 0.23801  | -0.00499 |
| C3  | 0.0555   | 0.05225  | 0.04707  | -0.00518 |
| C14 | -0.49717 | -0.49897 | -0.50519 | -0.00622 |
| C22 | -0.13189 | -0.12284 | -0.12925 | -0.00641 |
| C13 | -0.10276 | -0.10367 | -0.11106 | -0.00739 |
| C8  | -0.31503 | -0.31196 | -0.32071 | -0.00875 |
| C15 | -0.08715 | -0.08938 | -0.10011 | -0.01073 |
| C6  | -0.11612 | -0.1181  | -0.13323 | -0.01513 |

### 1.3 Bond dissociation energy calculation

All calculations are carried out in the gas phase. The bond dissociation energy was calculated by Gauss09 software at the B3LYP/6-31G (d, p) theoretical level. After measuring the bond understanding energy of these molecules, the single point energy and Enthalpy at 298 K was calculated according to the following equation:

$$\Delta H_{f, 298K}(X - H) = \Delta H_{f, 298K}(X) + \Delta H_{f, 298K}(H) - D_0(X - H)$$

The calculated enthalpy of molecular formation is shown in Table S3:

**Table S3.** Single point energy and enthalpy of formation of different amino groups after removal of hydrogen protons

| Name      | Single point energy<br>(Hartree) | Enthalpy<br>(Hartree) | Result 1 <sup>a</sup><br>(Kcal mol <sup>-1</sup> ) | Result 2 <sup>b</sup><br>(Kcal mol <sup>-1</sup> ) |
|-----------|----------------------------------|-----------------------|----------------------------------------------------|----------------------------------------------------|
| Dibekacin | -1583.634615                     | -1583.004776          | /                                                  | /                                                  |
| H         | -0.500273                        | -0.497912             | /                                                  | /                                                  |
| 9N(-41H)  | -1583.054116                     | -1582.440418          | 50.39059967                                        | 41.73540024                                        |
| 9N(-42H)  | -1583.055608                     | -1582.442205          | 49.45361651                                        | 40.61296758                                        |
| 17N(-51H) | -1583.055188                     | -1582.441426          | 49.7177305                                         | 41.10226531                                        |
| 17N(-52H) | -1583.059408                     | -1582.445567          | 47.06714379                                        | 38.5012616                                         |
| 18N(-53H) | -1583.054667                     | -1582.440617          | 50.04461781                                        | 41.61040634                                        |
| 18N(-54H) | -1583.060068                     | -1582.445697          | 46.65209495                                        | 38.4196073                                         |
| 30N(-65H) | -1583.05387                      | -1582.440327          | 50.54524665                                        | 41.92194892                                        |
| 30N(-66H) | -1583.055369                     | -1582.441433          | 49.60409911                                        | 41.09786854                                        |
| 31N(-67H) | -1583.056484                     | -1582.442982          | 48.90355541                                        | 40.12492608                                        |
| 31N(-68H) | -1583.054063                     | -1582.440121          | 50.42407166                                        | 41.79255825                                        |

<sup>a</sup>The result is calculated by single point energy. <sup>b</sup>The result is calculated from the enthalpy of formation.

## 1.4 Hydrogen bond interaction and conformational inversion speculation of Dibekacin

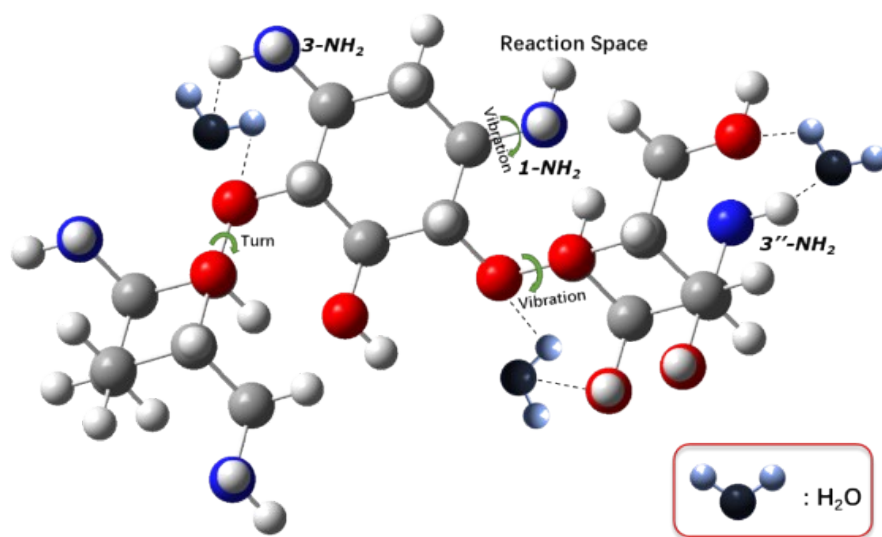

Fig. S2. Speculative twisted view of the structure of Dibekacin

## 2. Scale-up experiment data

**Table S4 The feeding batch of scale-up synthesis and the yield of each component**

| entry <sup>a</sup> | Dibekacin/g | composition of the crude product by HPLC (%) <sup>b</sup> |           |           |           |           |
|--------------------|-------------|-----------------------------------------------------------|-----------|-----------|-----------|-----------|
|                    |             | Arbekacin                                                 | <b>1a</b> | <b>1b</b> | Dibekacin | <b>1c</b> |
| 1                  | 100.0       | 38.8                                                      | 21.8      | 5.4       | 21.5      | 12.5      |
| 2                  | 120.0       | 40.4                                                      | 20.1      | 5.7       | 22.2      | 11.6      |
| 3                  | 150.0       | 37.9                                                      | 21.5      | 5.7       | 23.9      | 11.0      |

<sup>a</sup>Unless indicated otherwise, the specific reaction conditions are the same as those of the pilot-scale optimization. <sup>b</sup>After all the reactions were completed, HPLC detection was performed, the results are show in Fig. S27-S29.



### 3. NMR Spectra, HRMS and HPLC

#### 3.1 NMR Spectra

<sup>1</sup>H NMR (600 MHz, D<sub>2</sub>O)

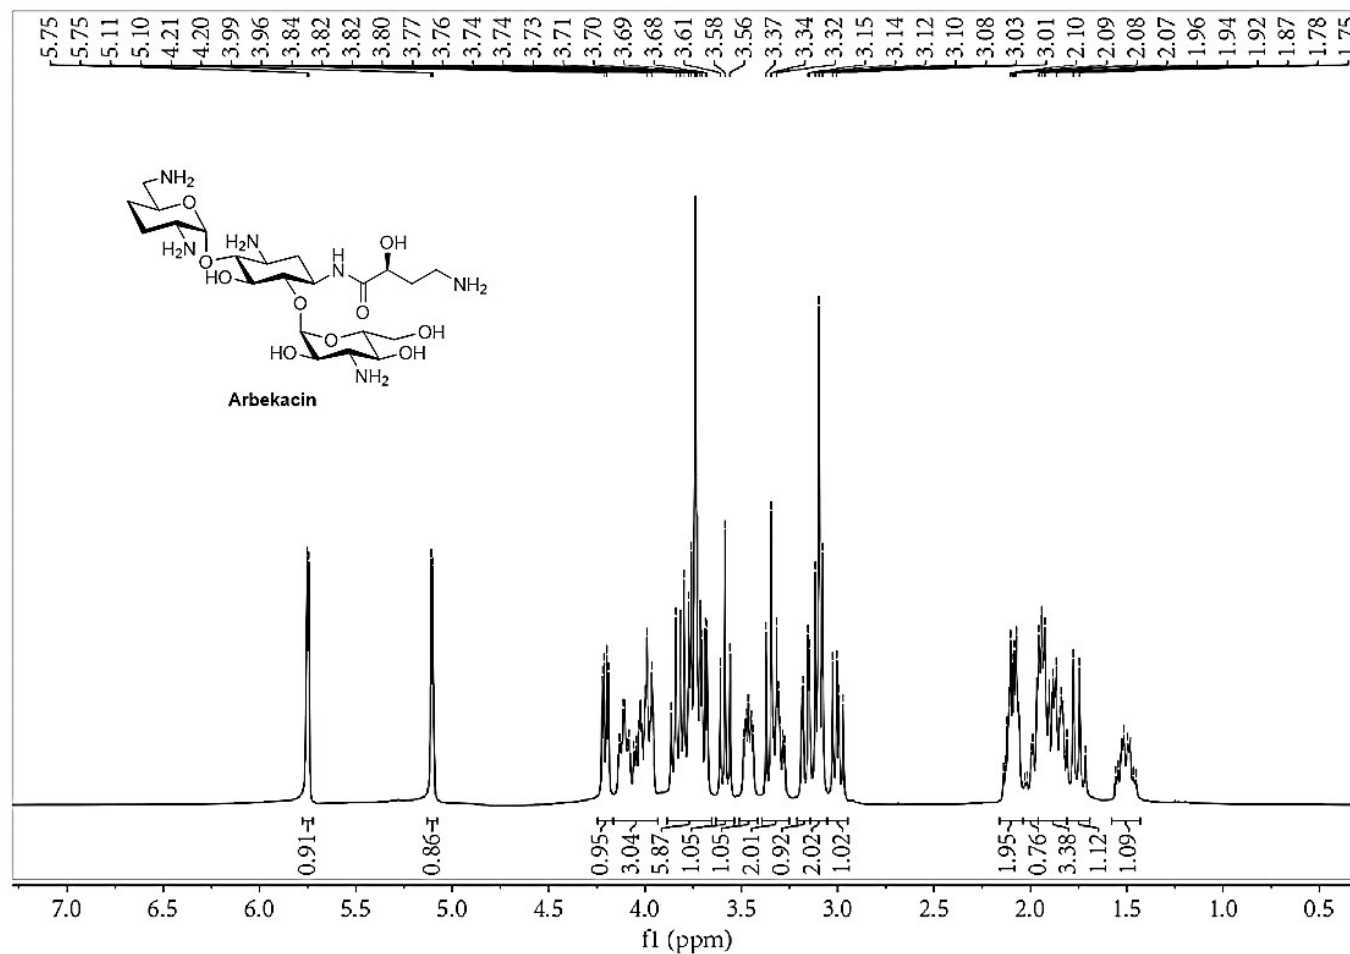

Fig. S3. <sup>1</sup>H NMR of Arbekacin

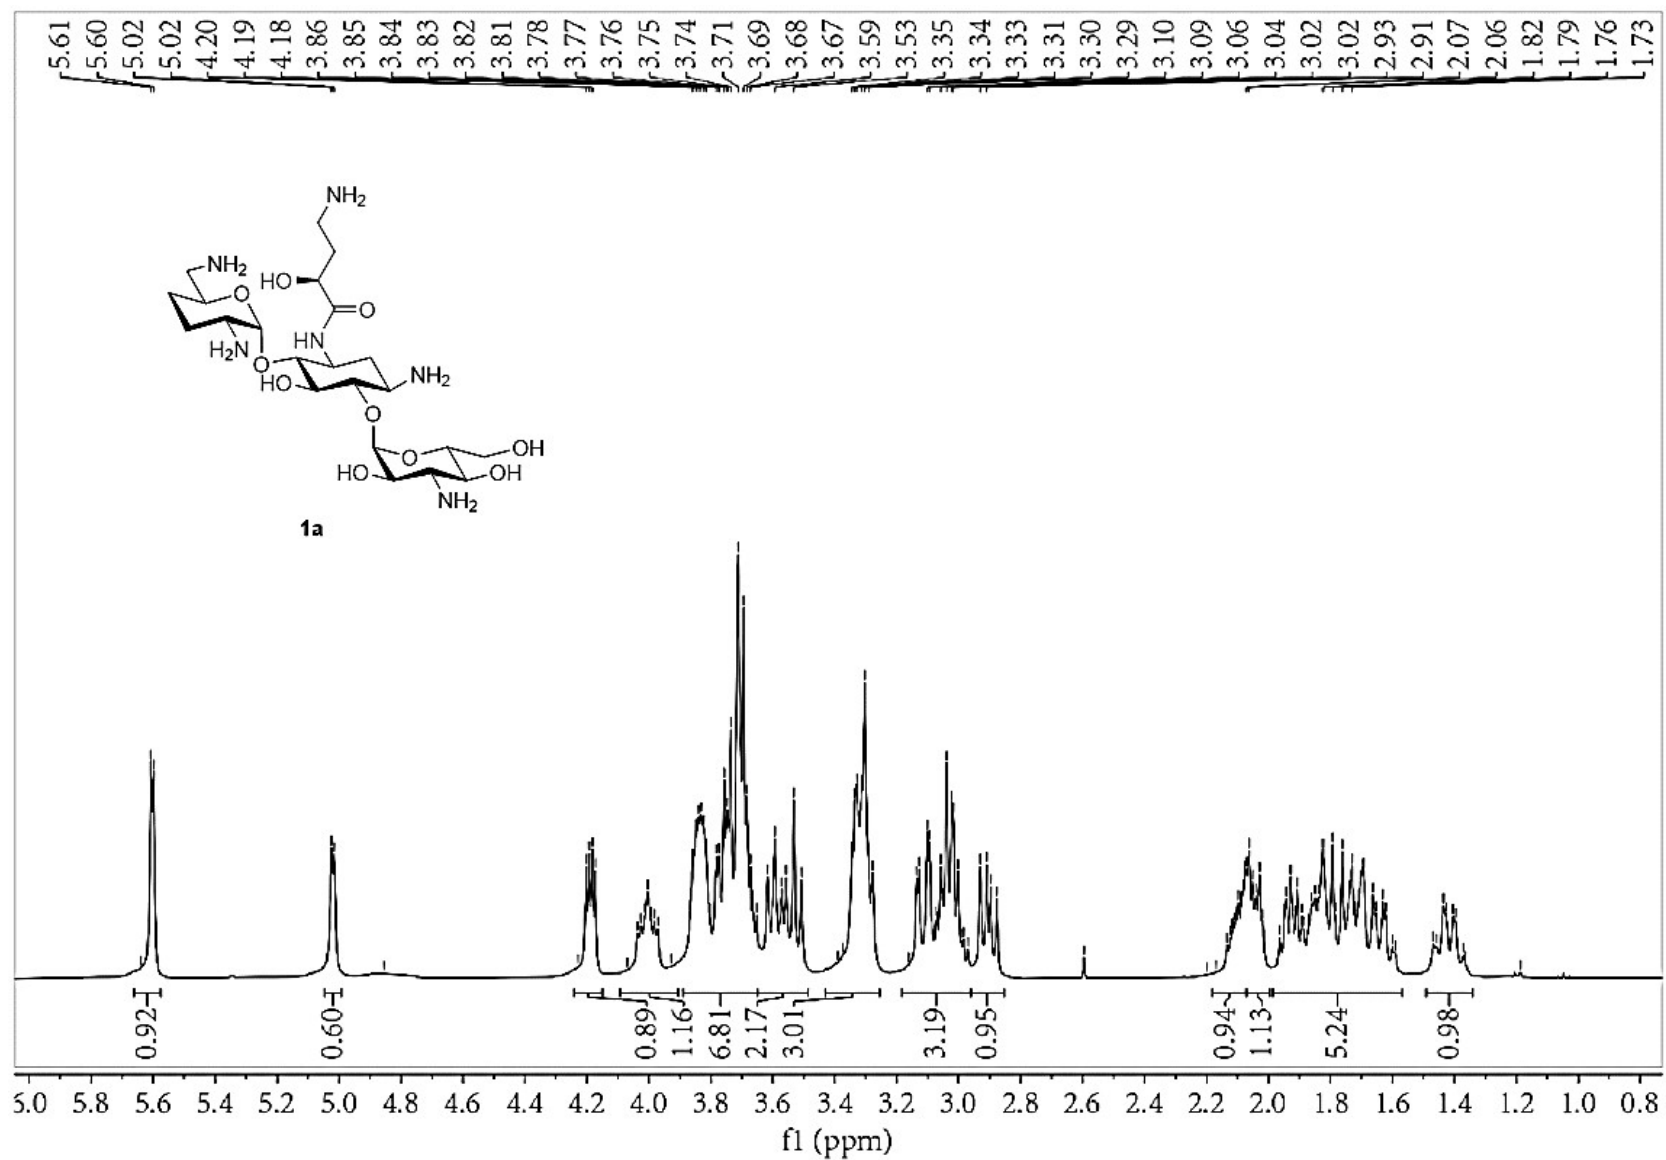

Fig. S4.  $^1\text{H}$  NMR of **1a**

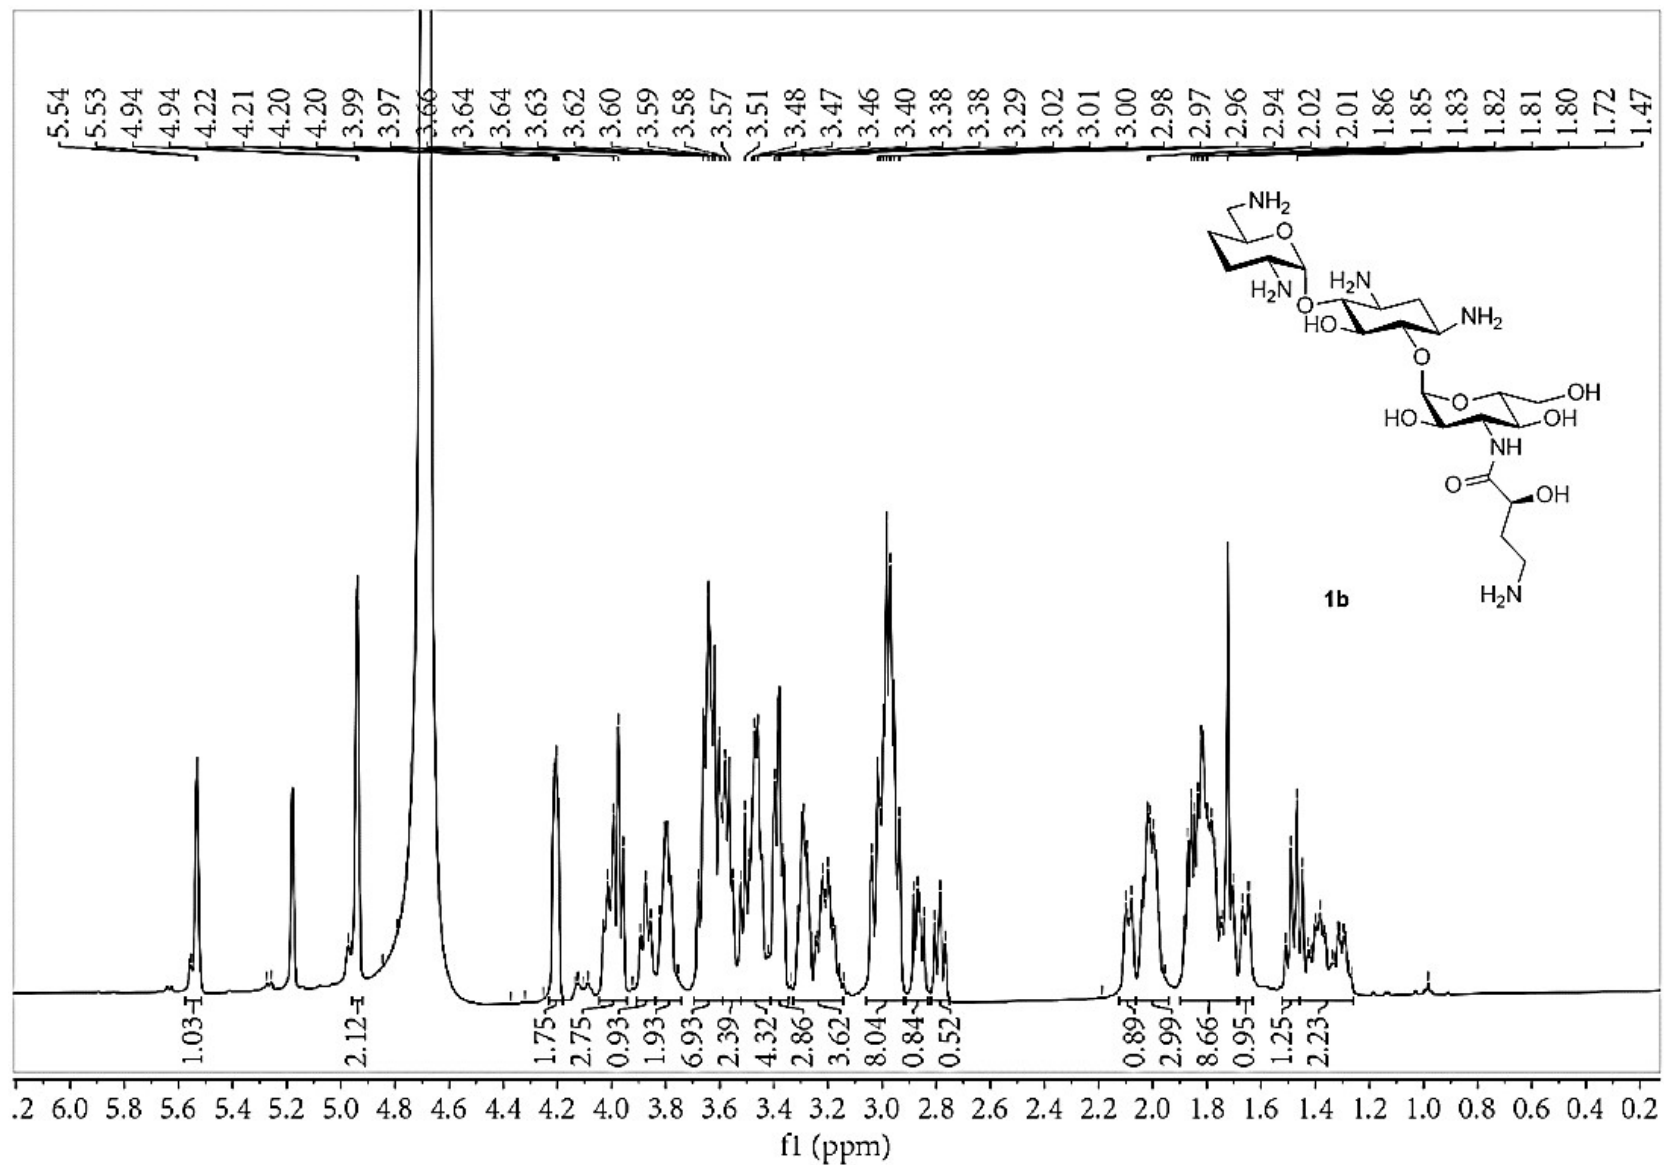

Fig. S5.  $^1\text{H}$  NMR of **1b**

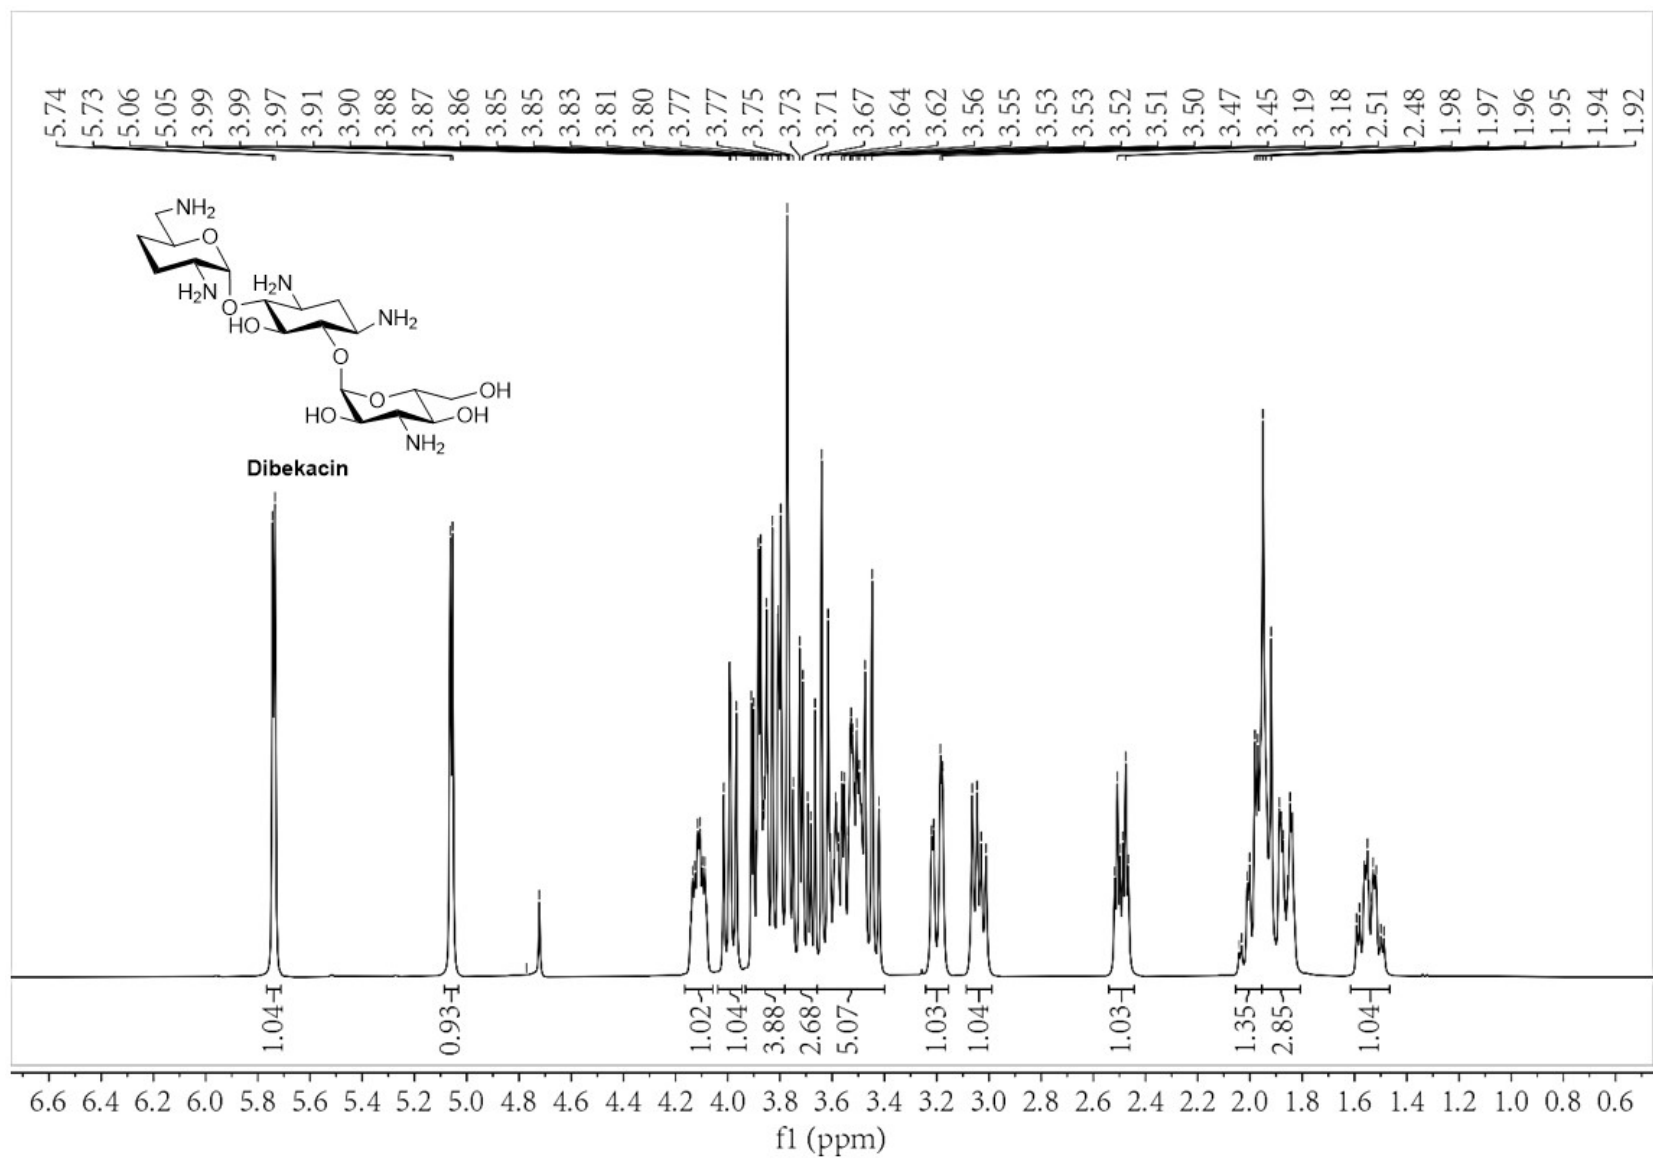

**Fig. S6.** <sup>1</sup>H NMR of Dibekacin

$^{13}\text{C}$  NMR (150 MHz,  $\text{D}_2\text{O}$ )

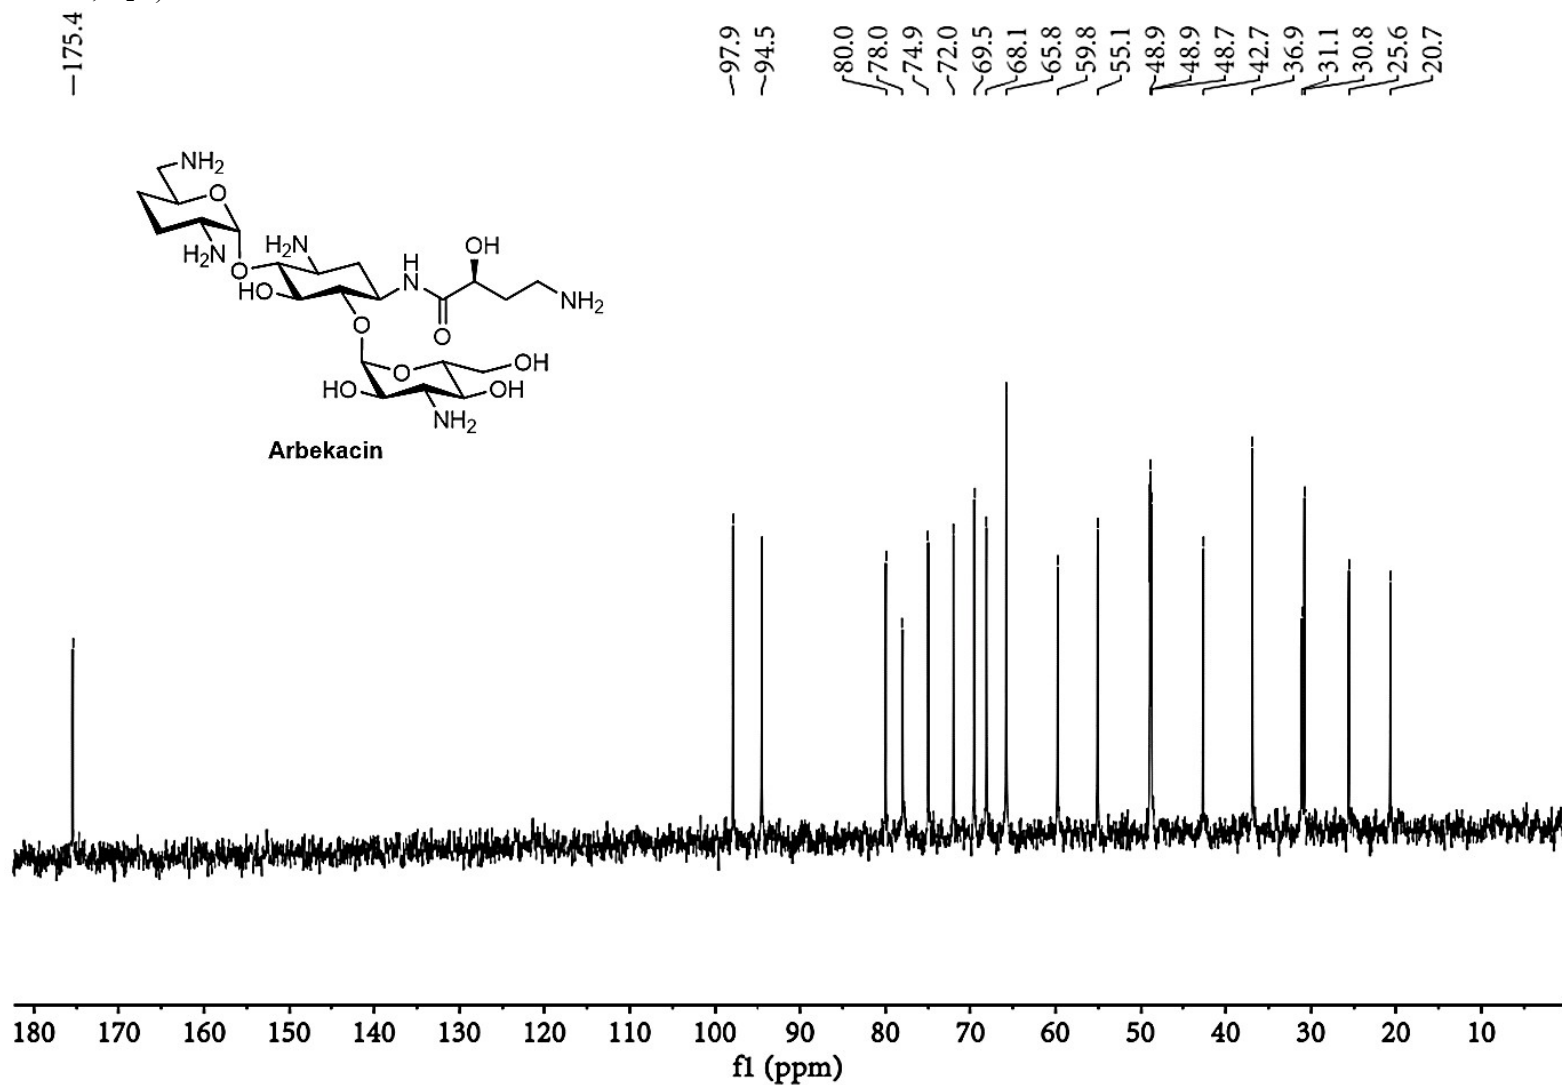

Fig. S7.  $^{13}\text{C}$  NMR of Arbekacin

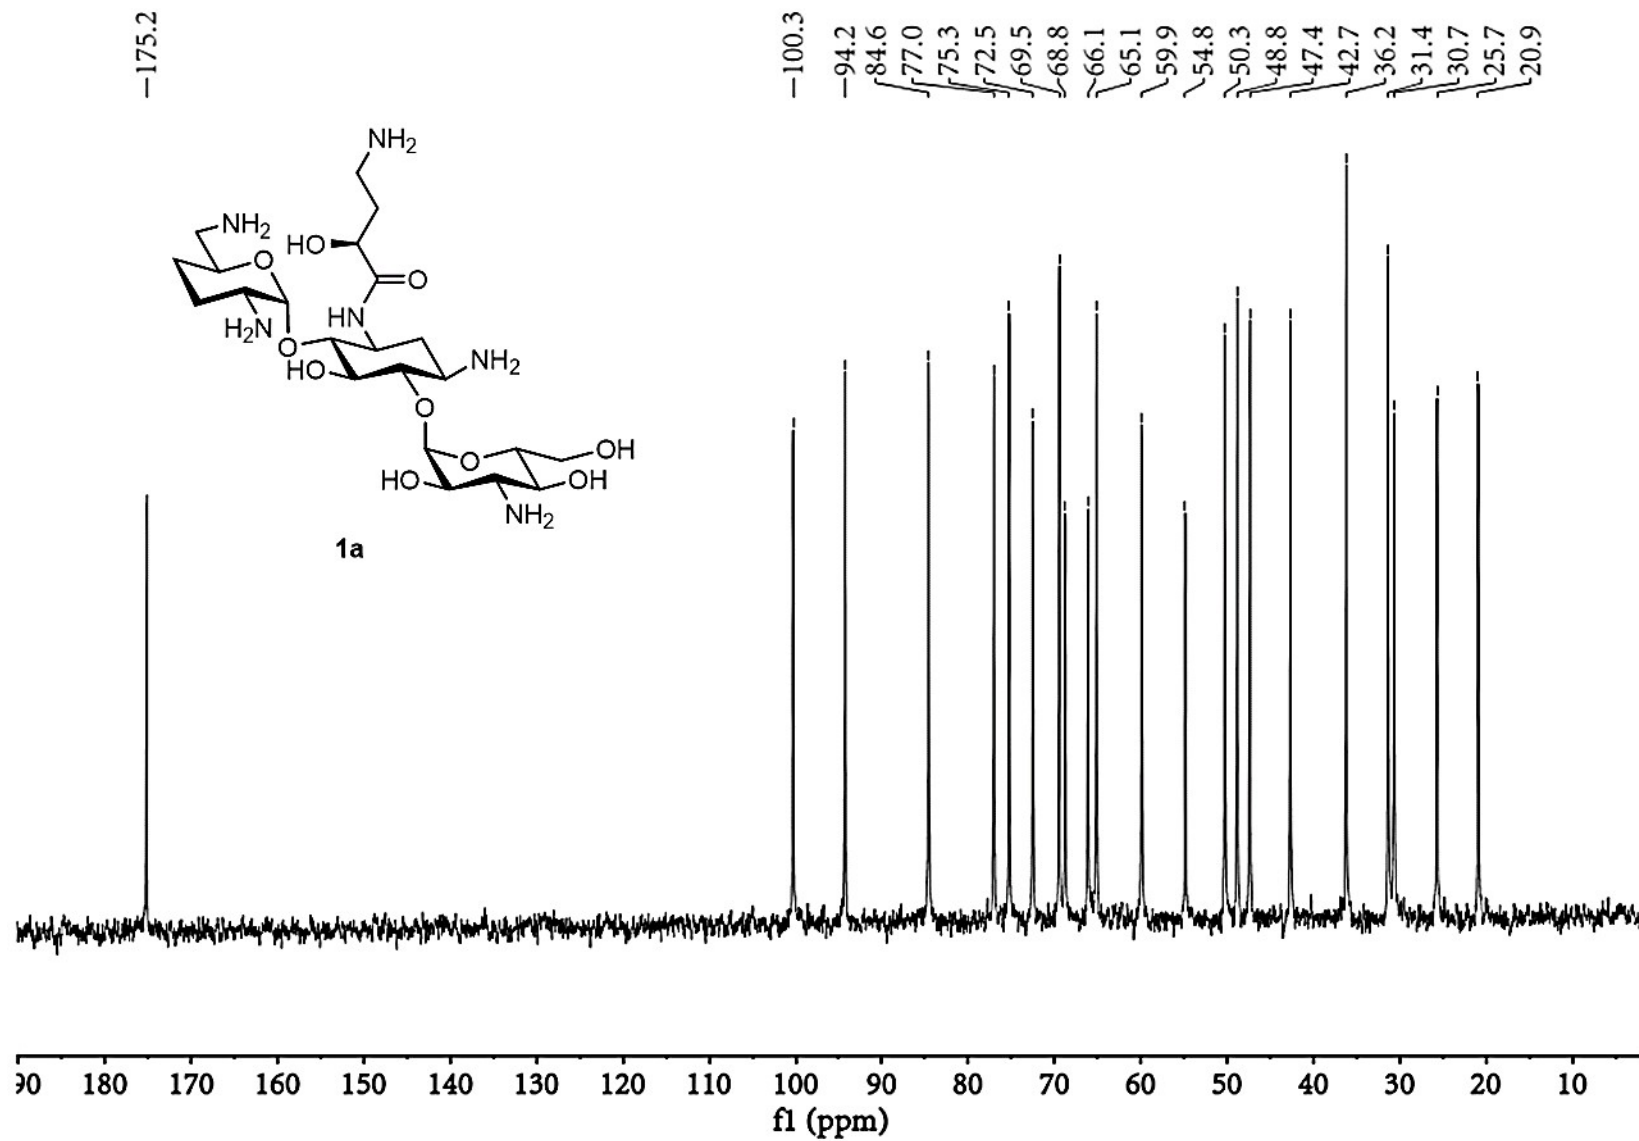

Fig. S8.  $^{13}\text{C}$  NMR of 1a

-177.4

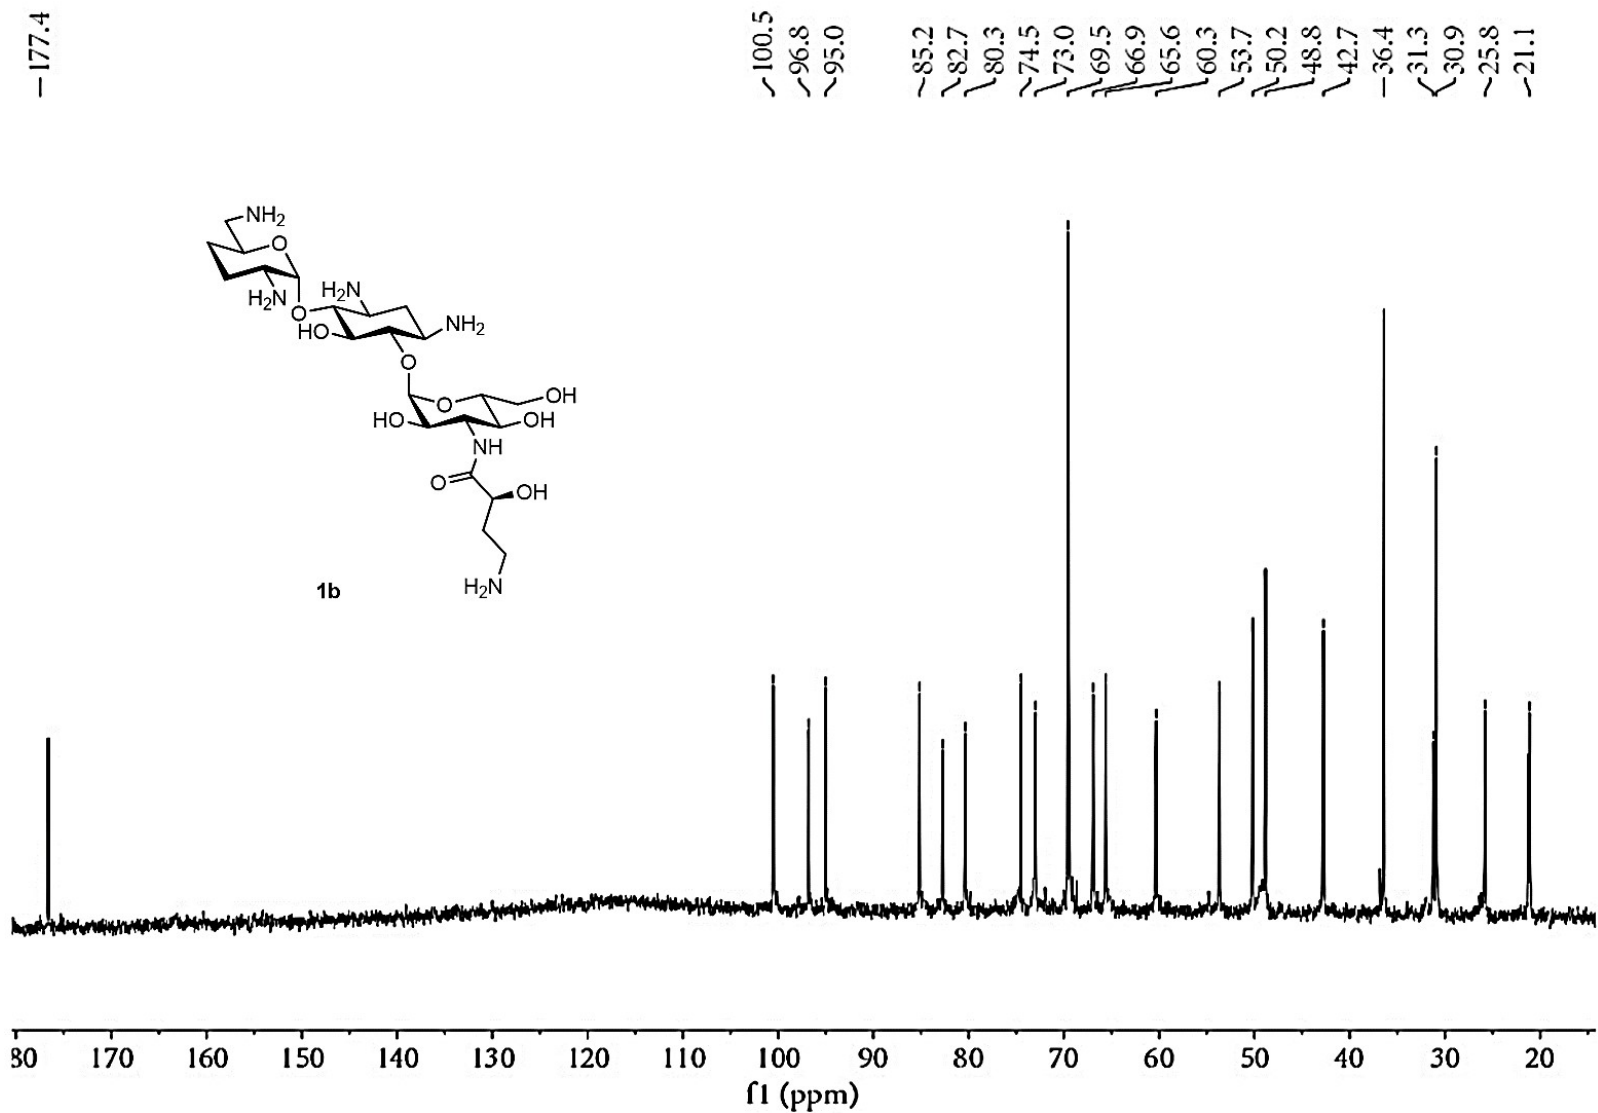

Fig. S9. <sup>13</sup>C NMR of 1b

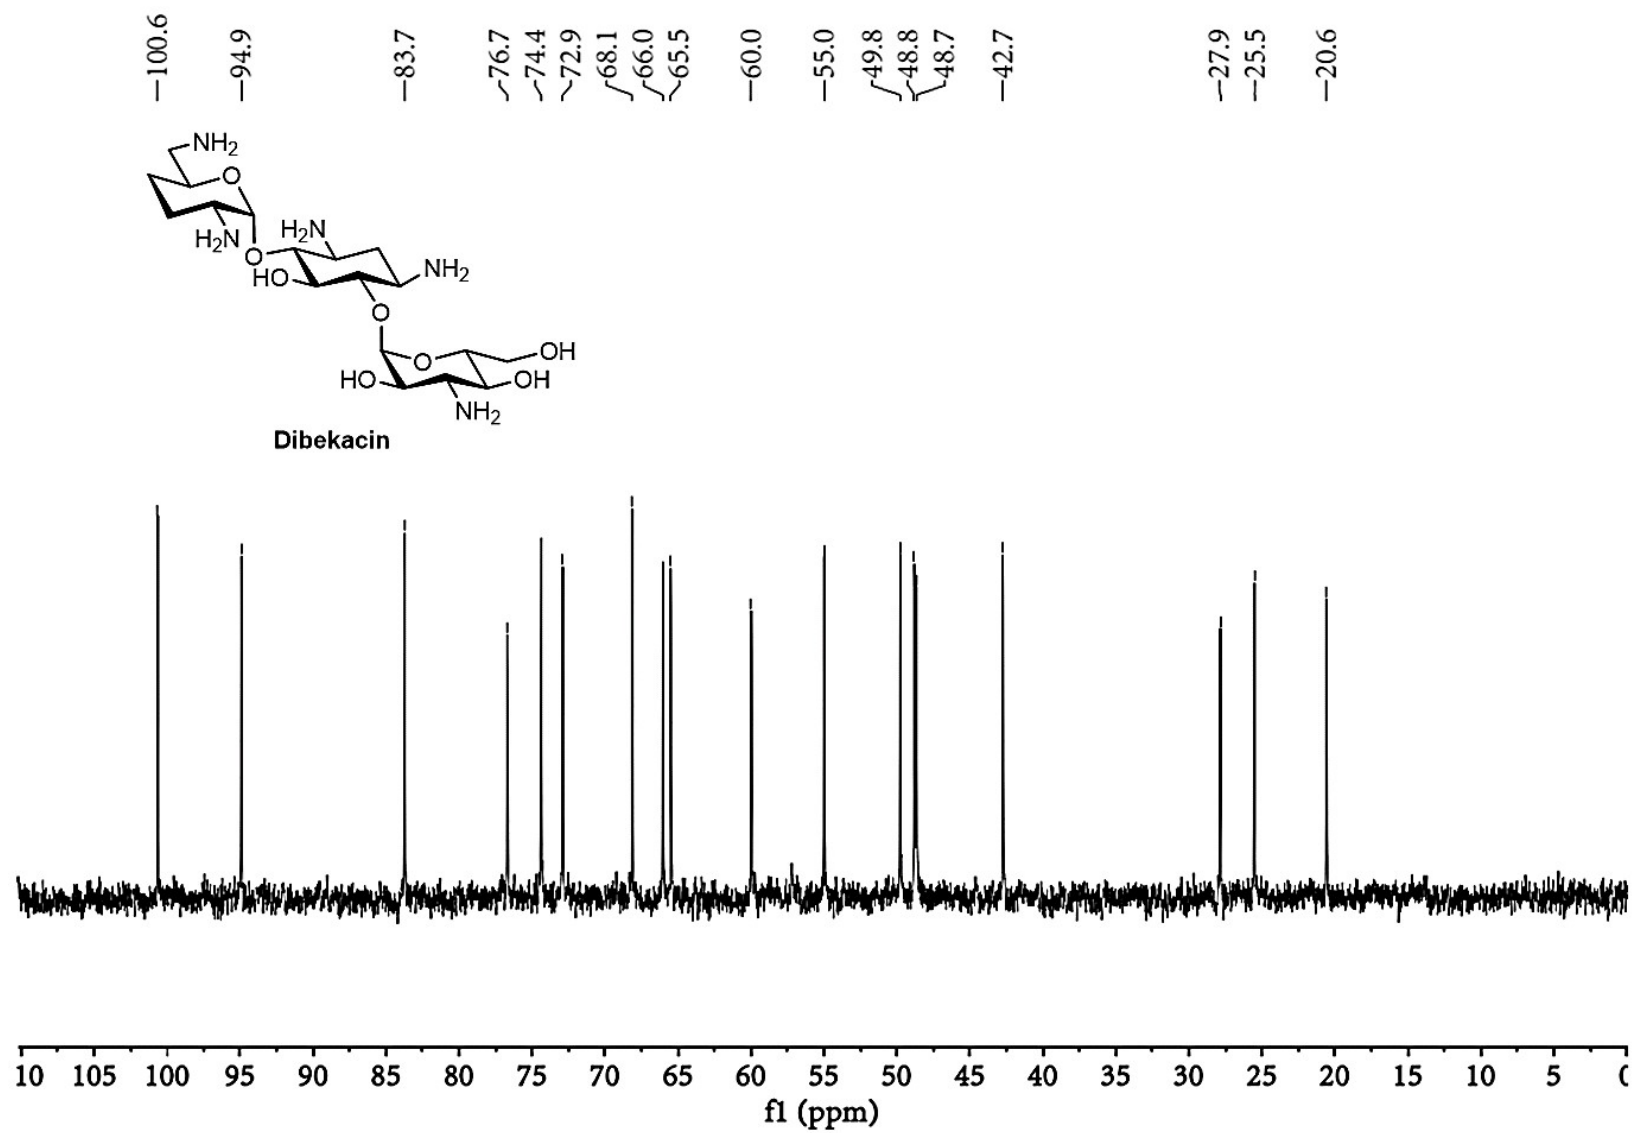

Fig. S10.  $^{13}\text{C}$  NMR of Dibekacin





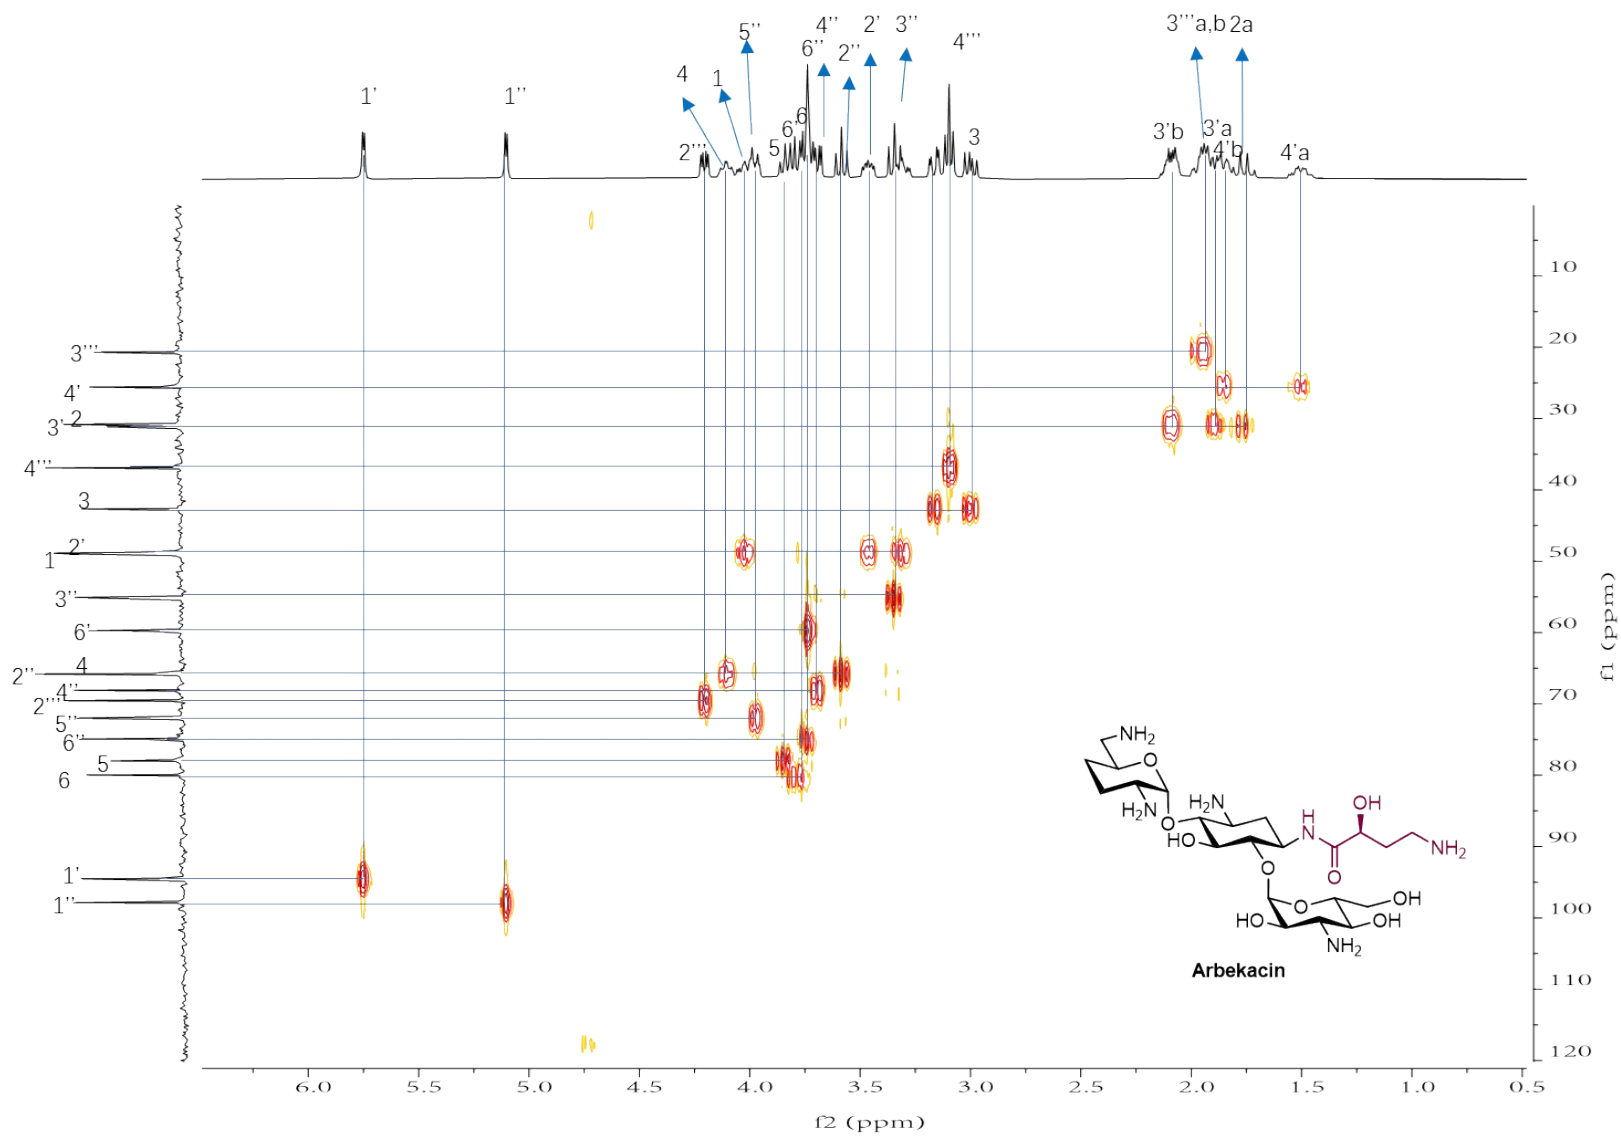

**Fig. S12.** HSQC of Arbekacin

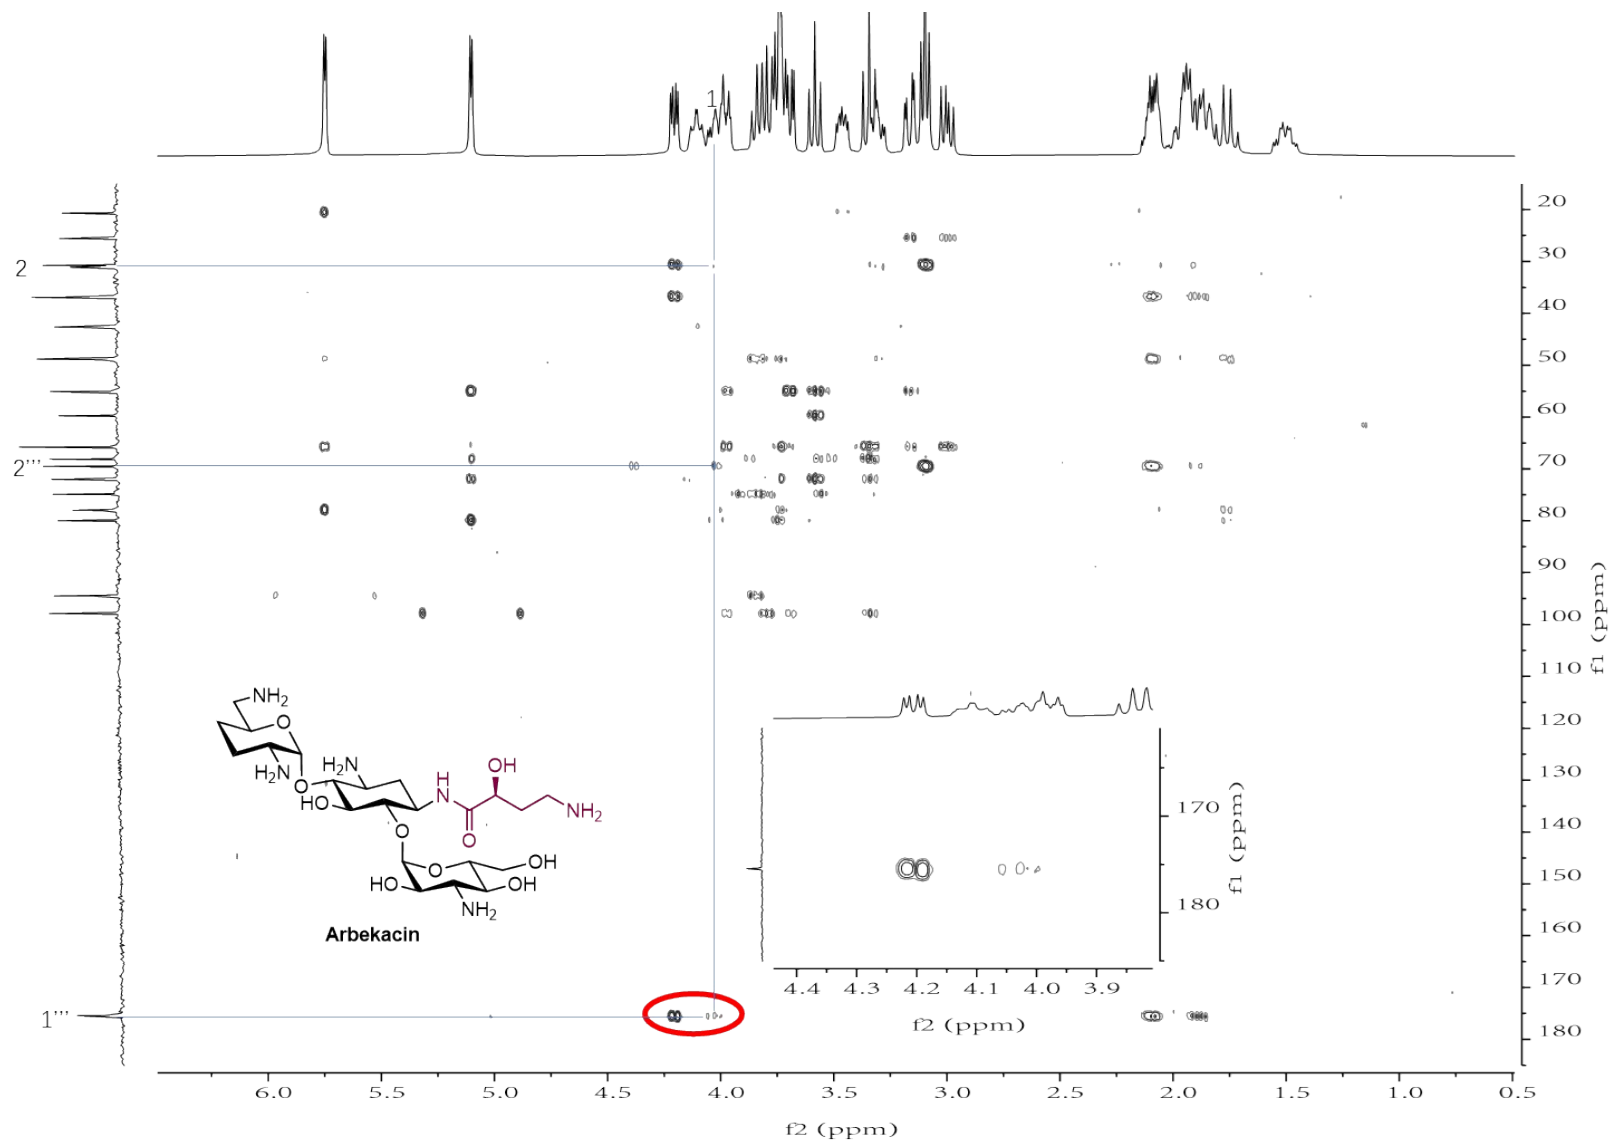

**Fig. S13.** HMBC of Arbekacin

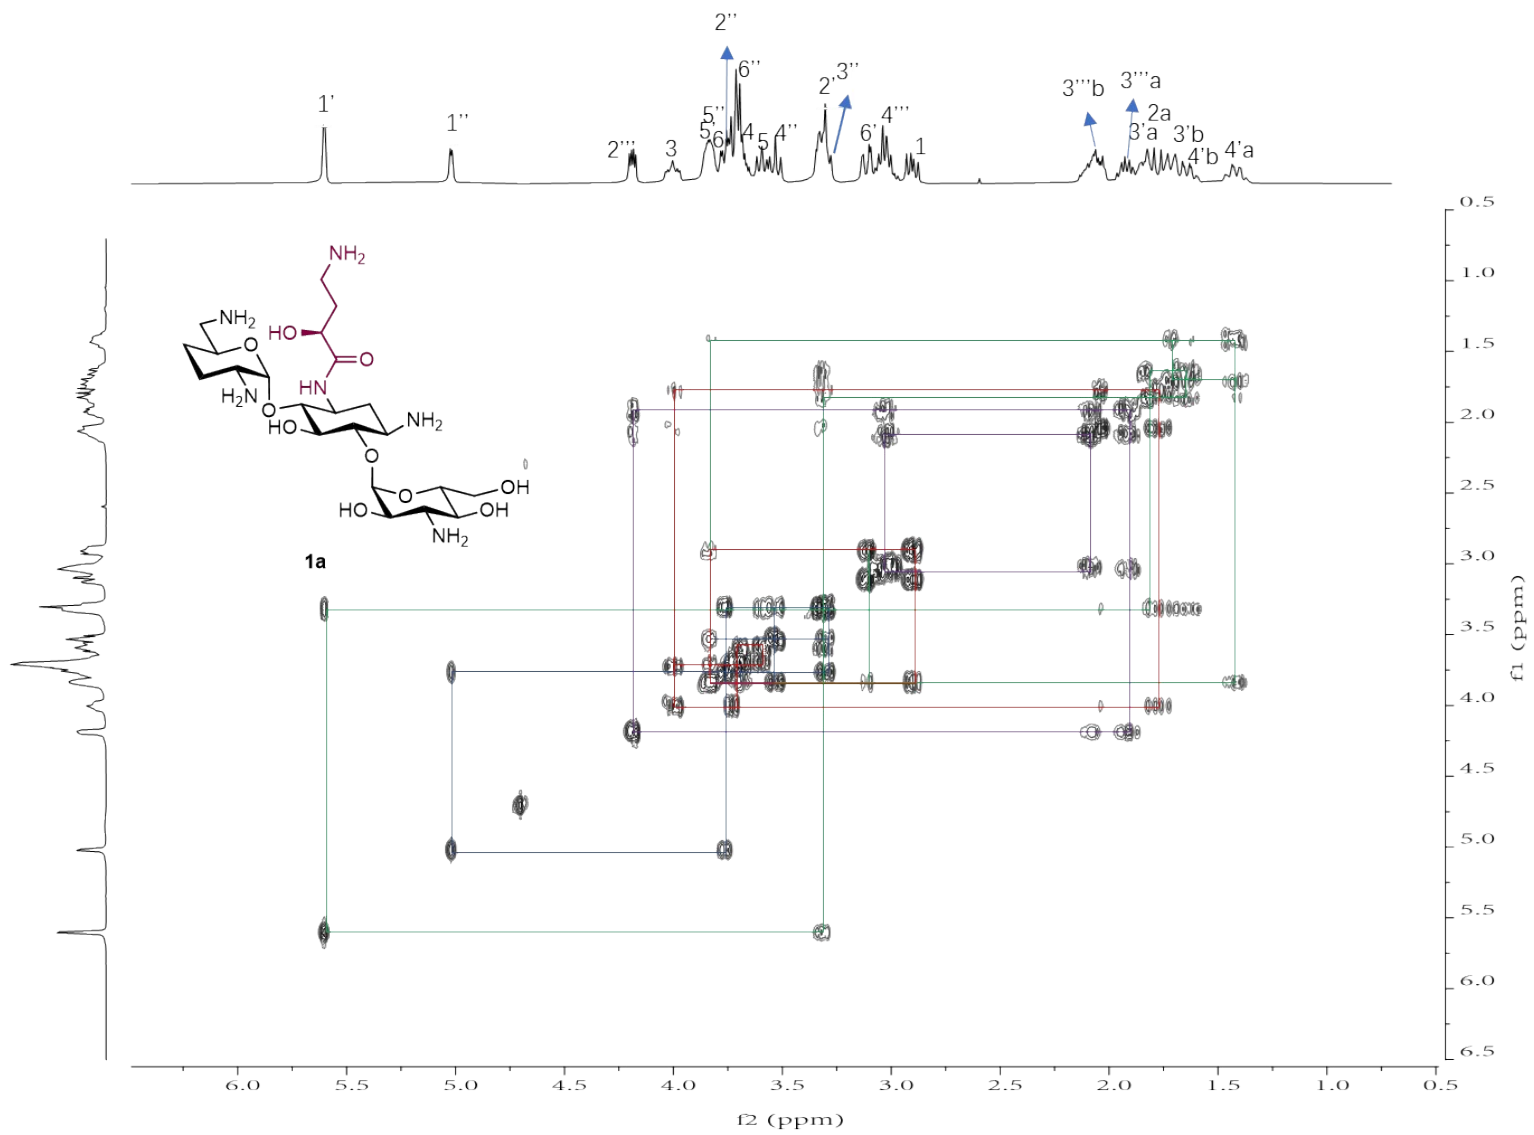

**Fig. S14.**  $^1\text{H}$ - $^1\text{H}$  COSY of **1a**

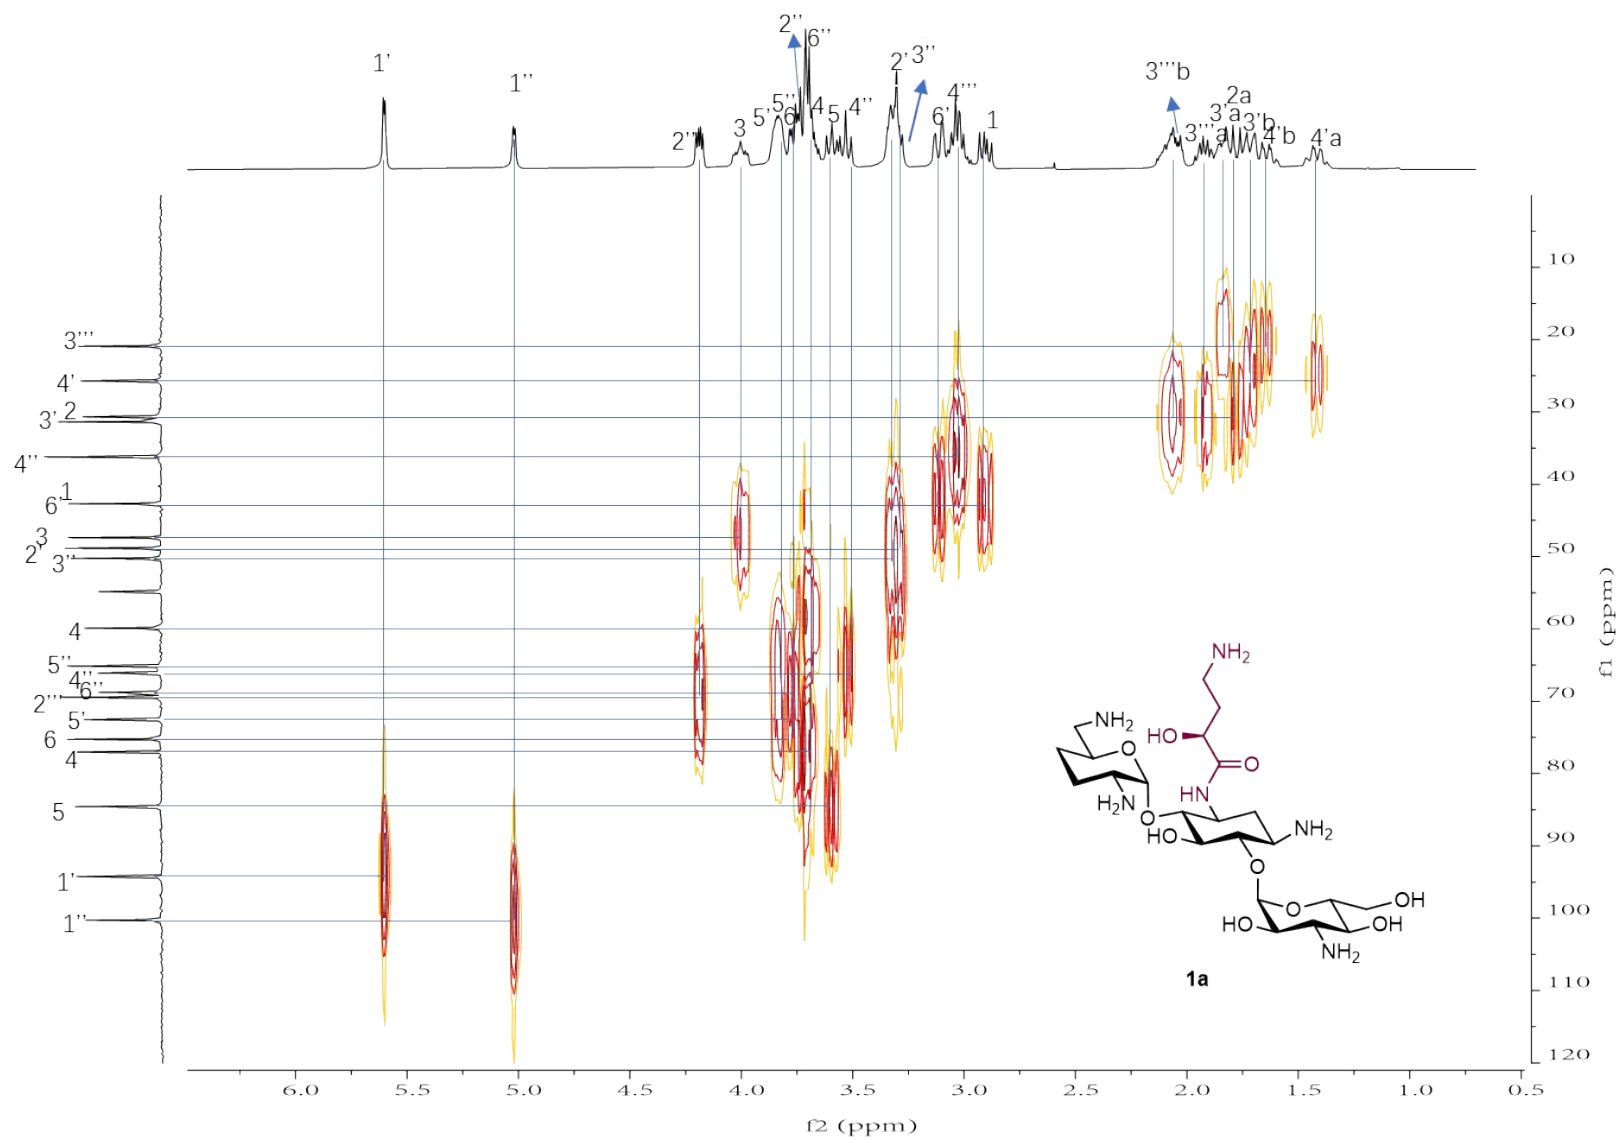

**Fig. S15. HSQC of 1a**

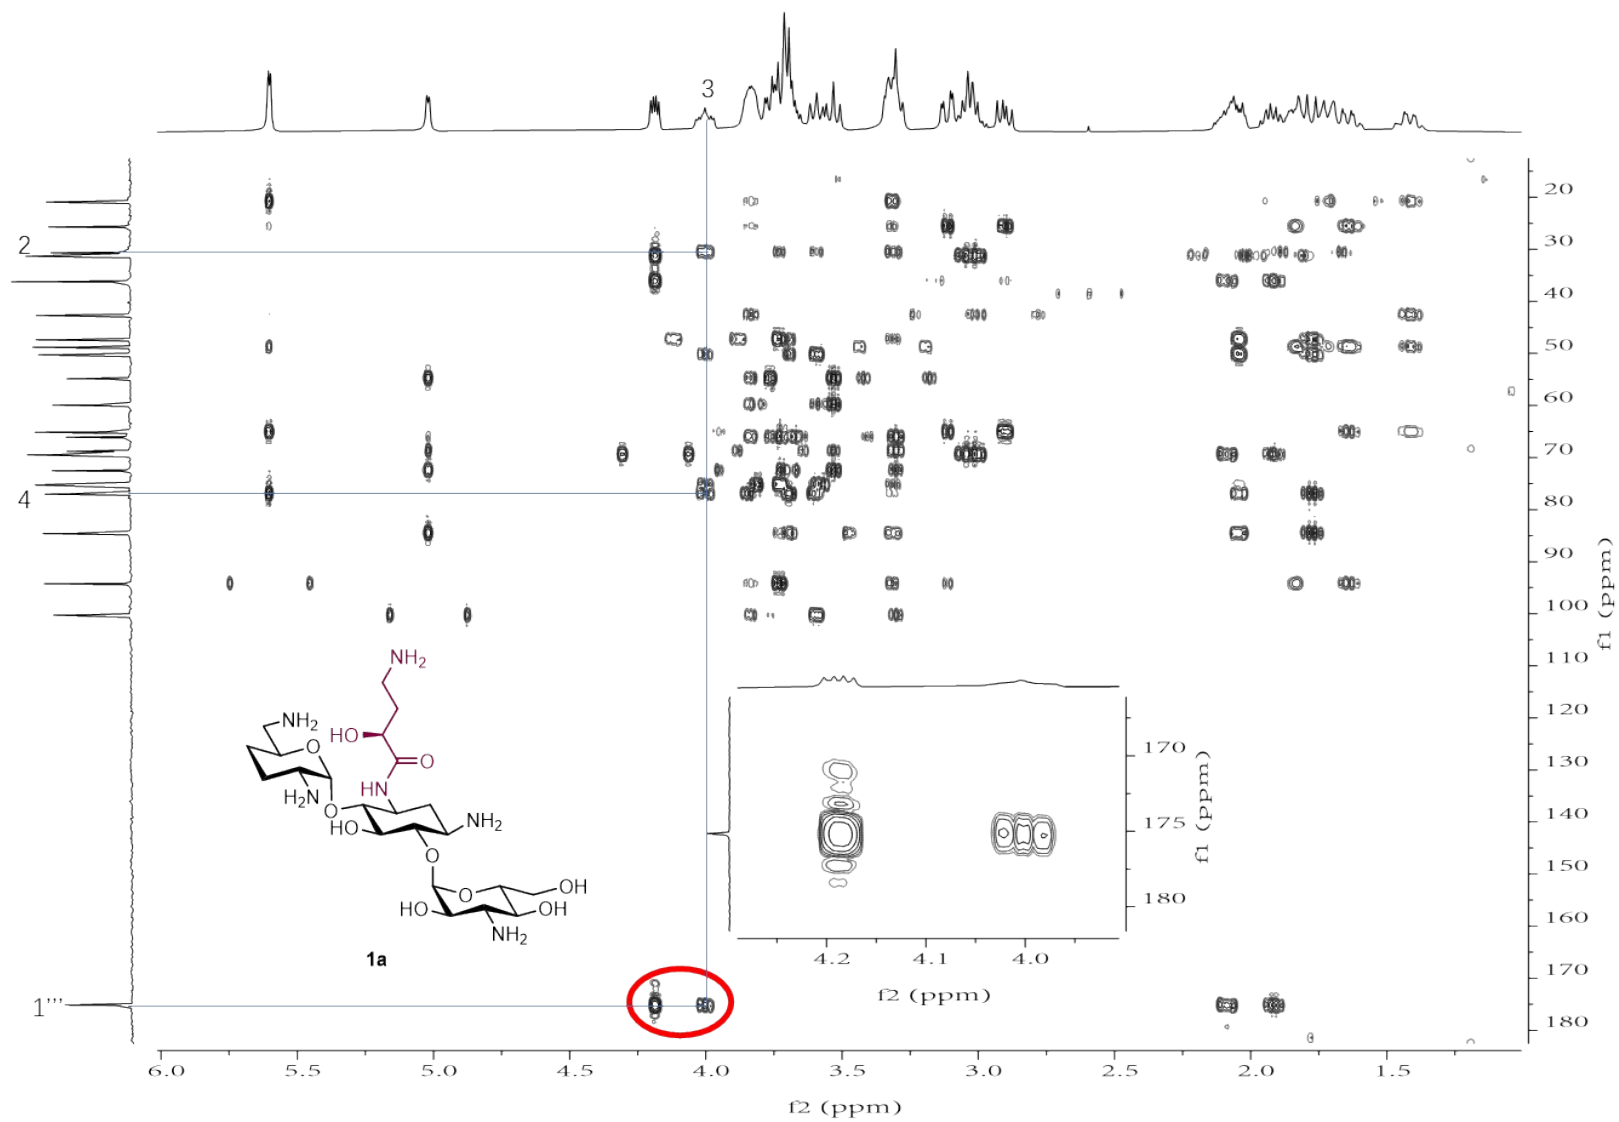

**Fig. S16. HMBC of 1a**

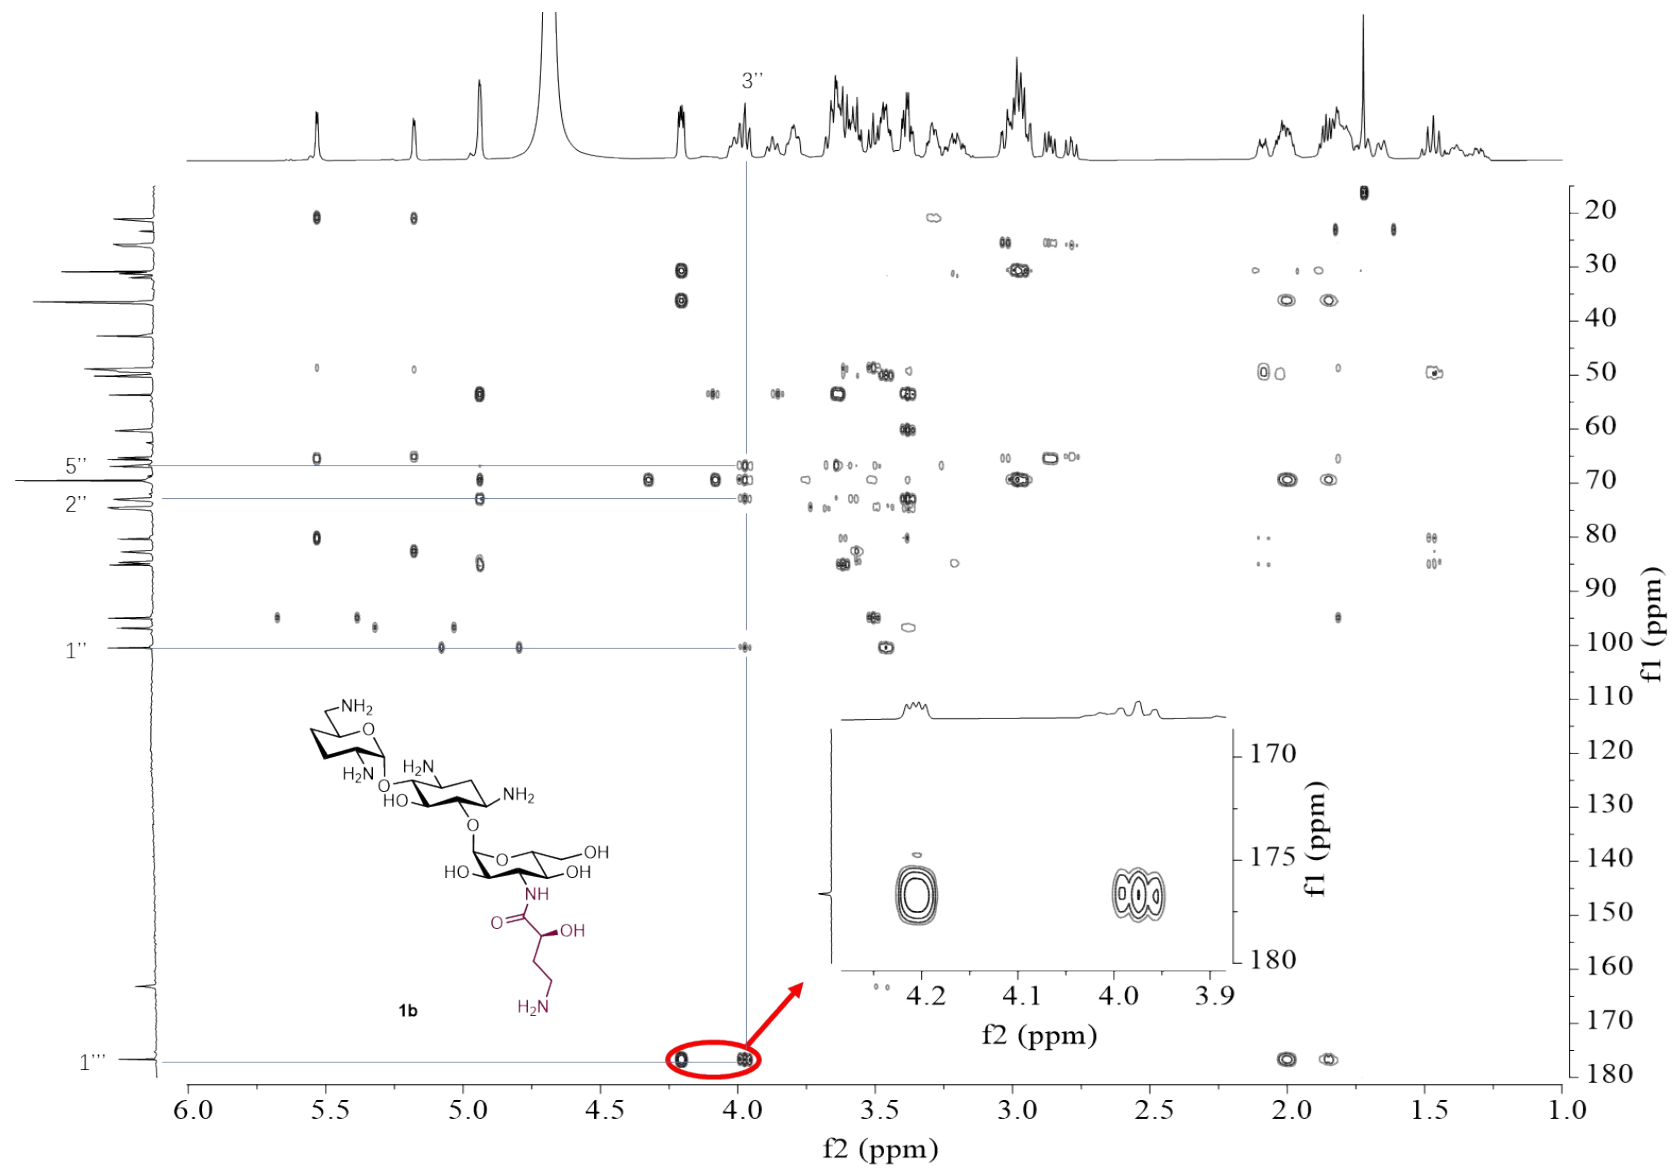

**Fig. S17. HMBC of 1b**

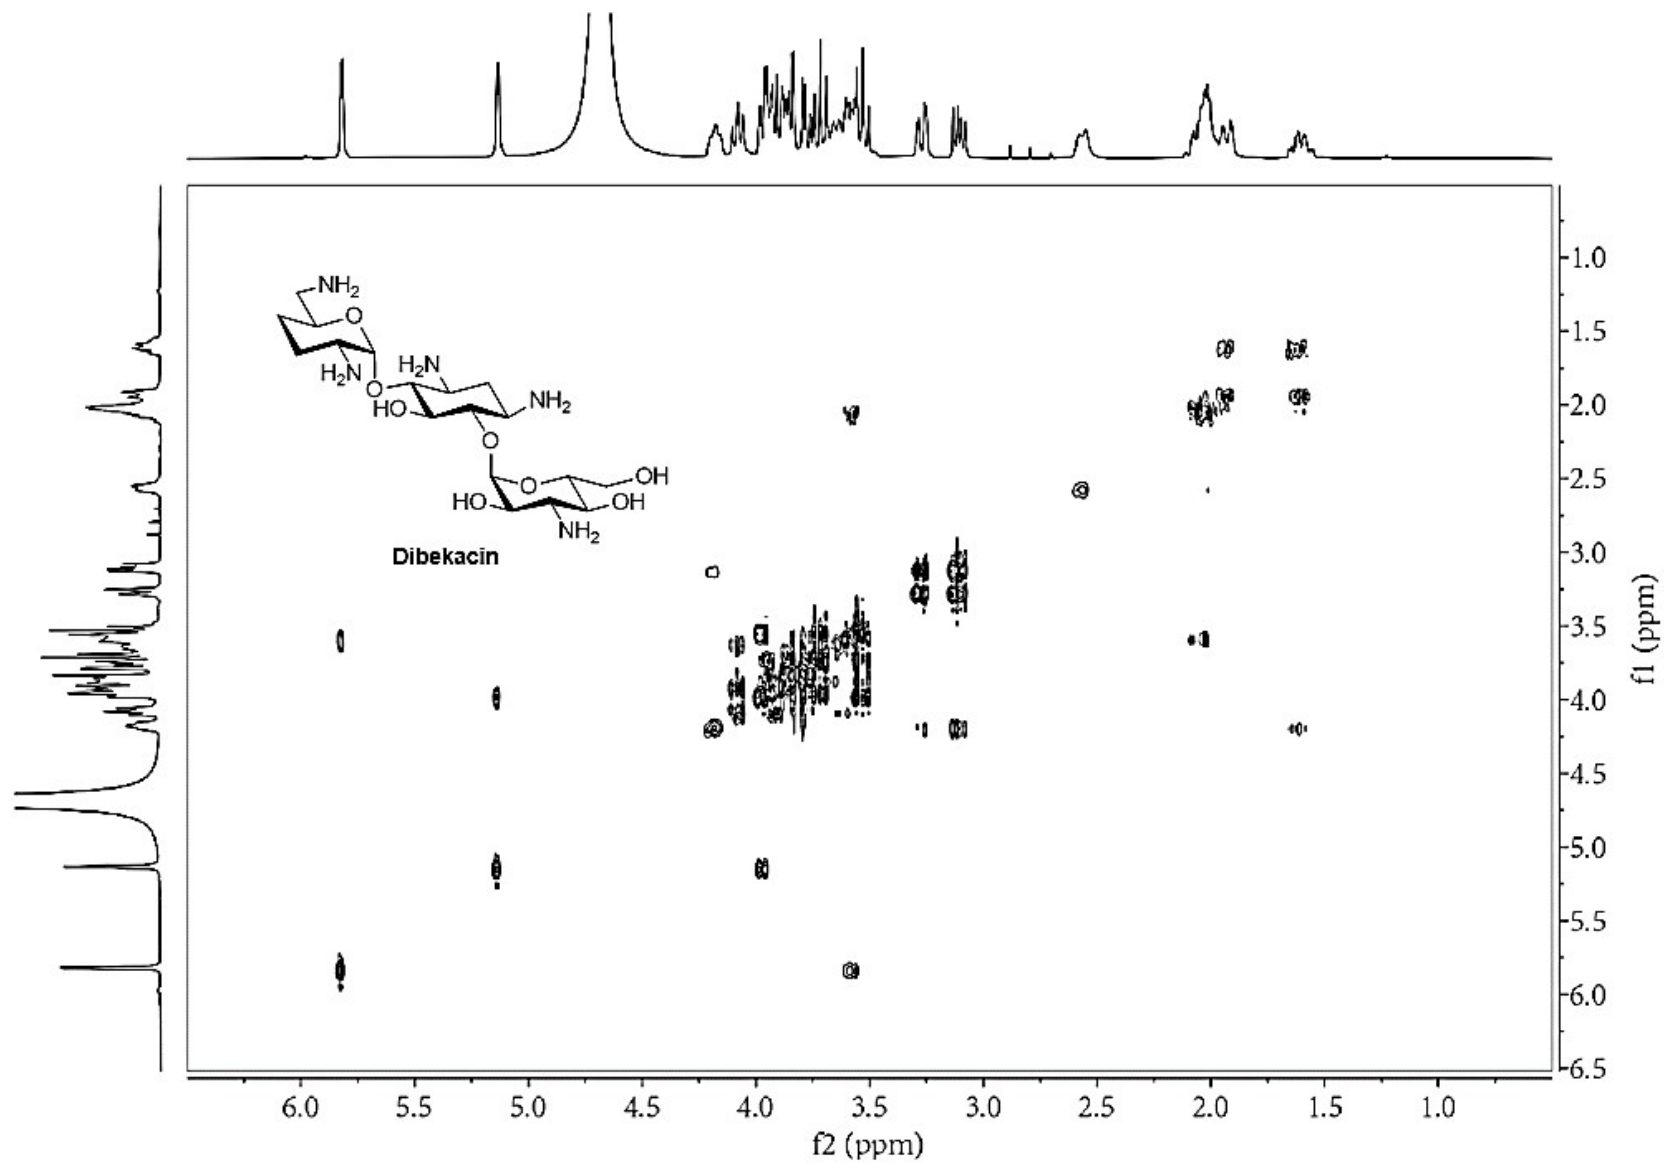

Fig. S18.  $^1\text{H}$ - $^1\text{H}$  COSY of Dibekacin



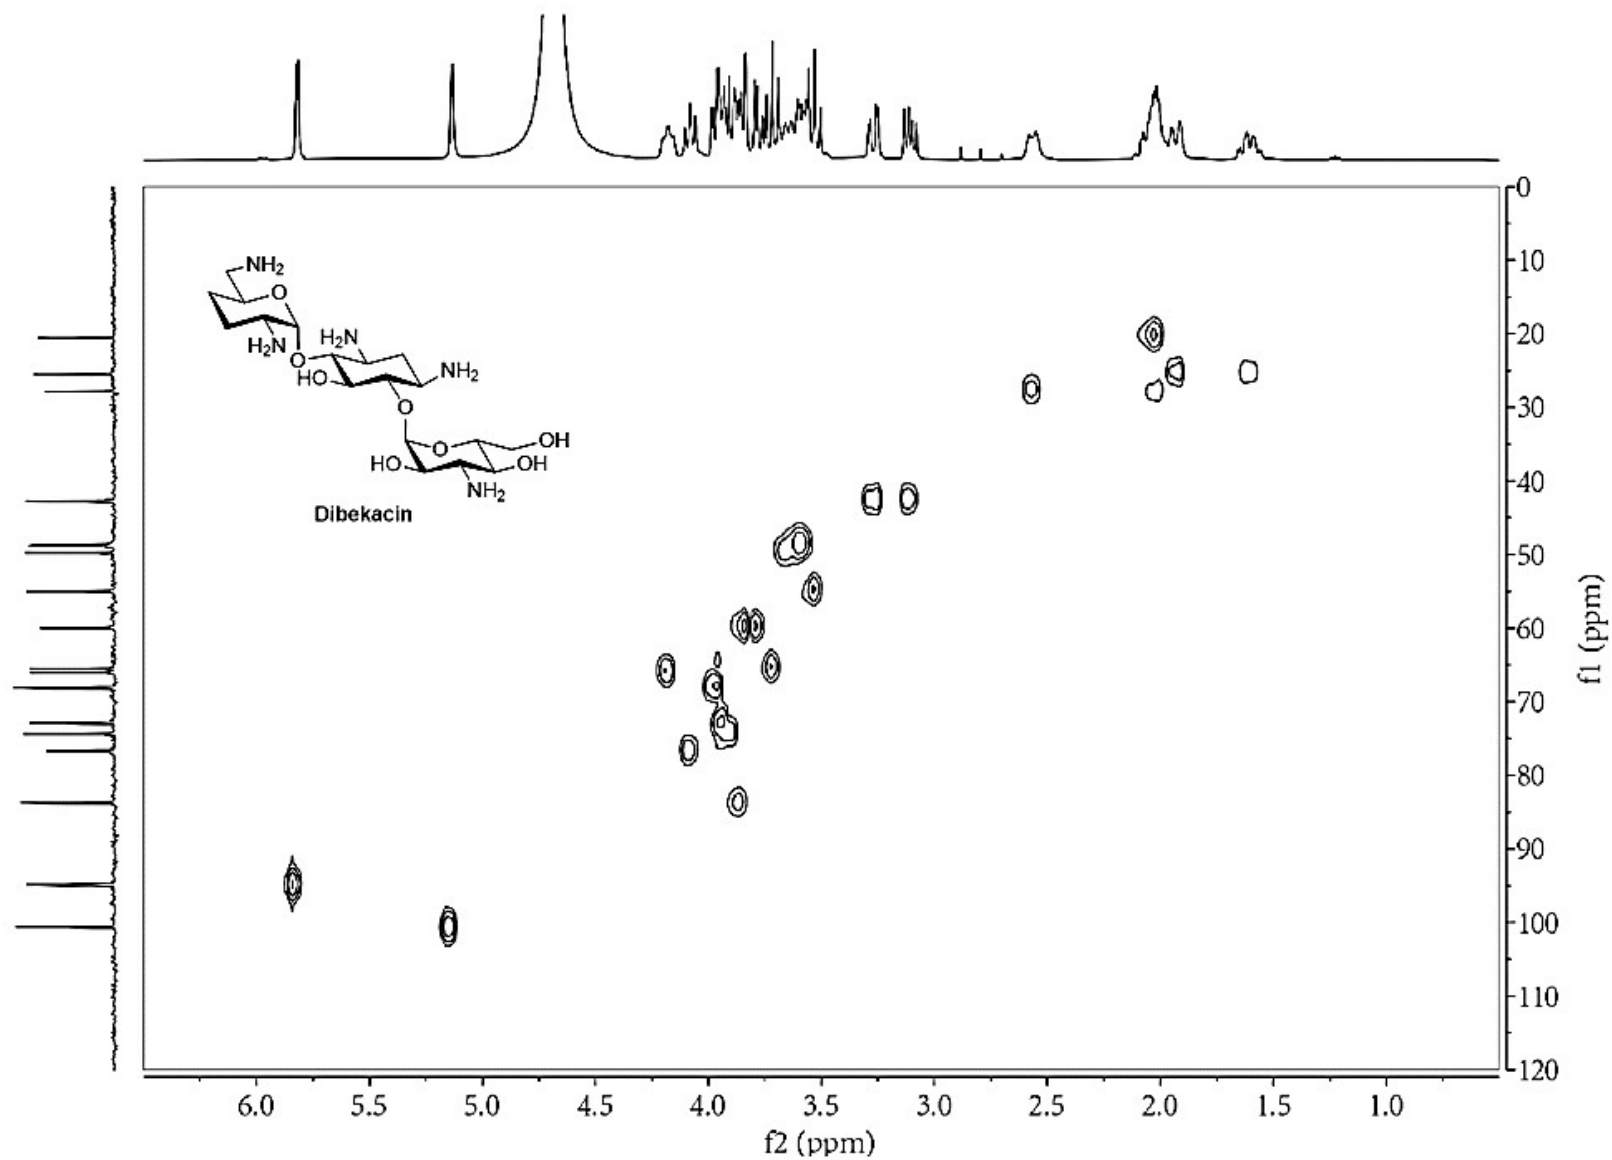

Fig. S19. HSQC of Dibekacin

### 3.2 HRMS and analysis

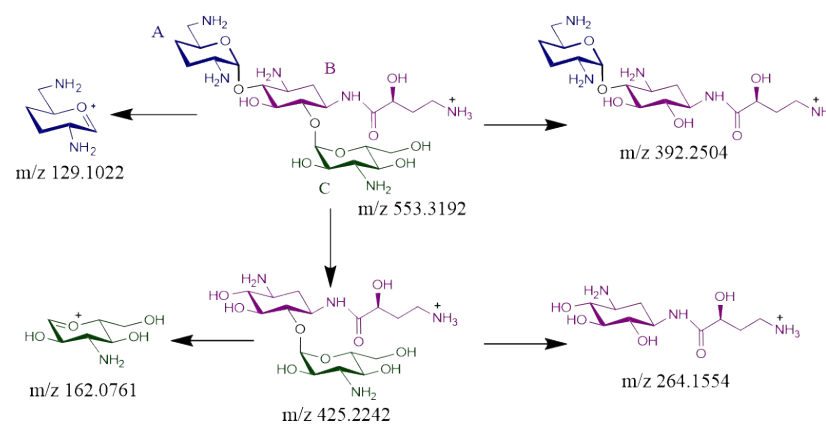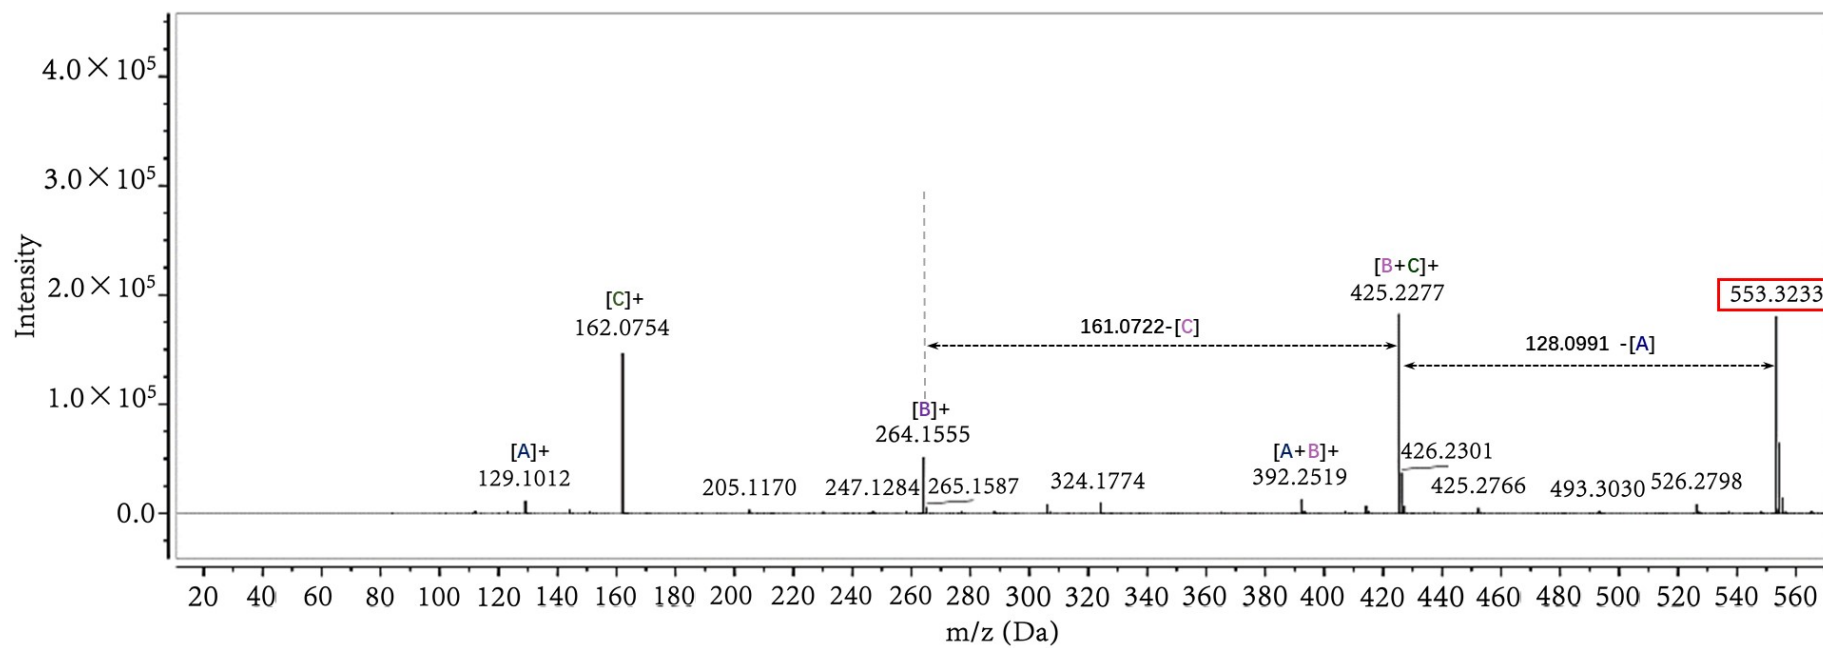

Fig. S20. HRMS and fragment ion analysis of Arbekacin



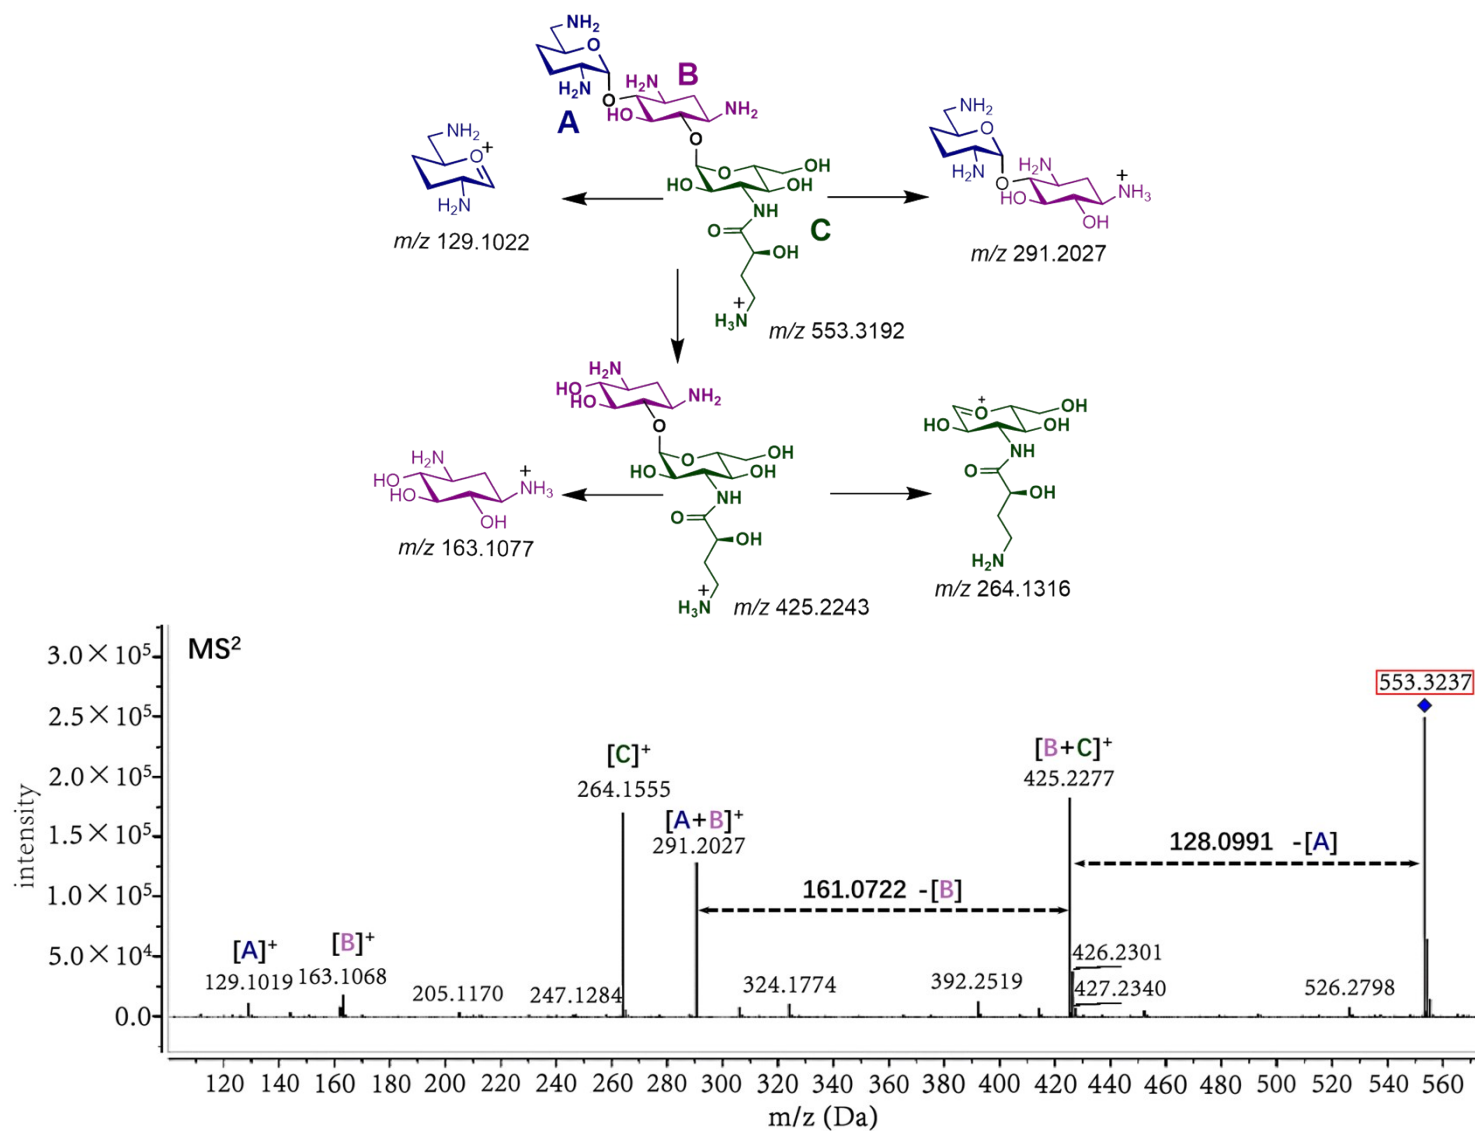

**Fig. S22.** HRMS and fragment ion analysis of **1b**

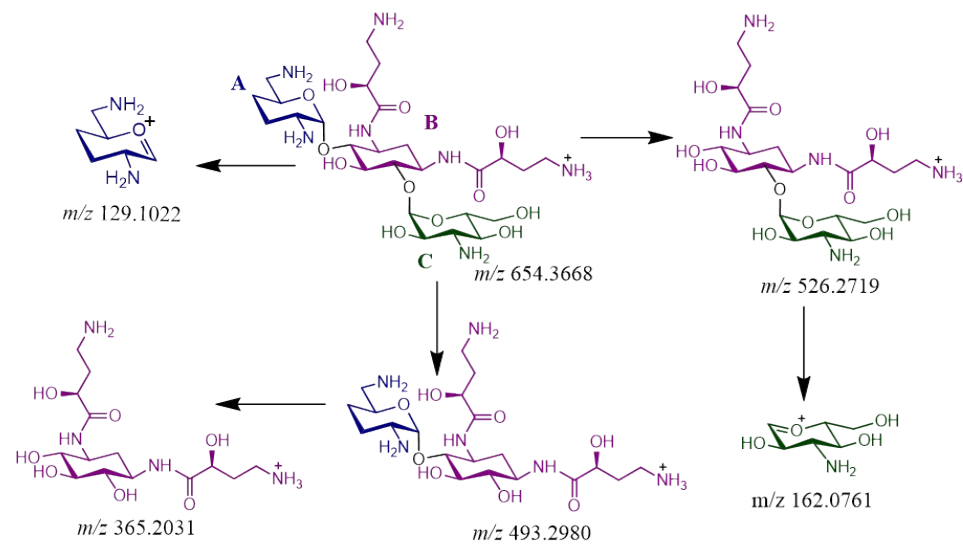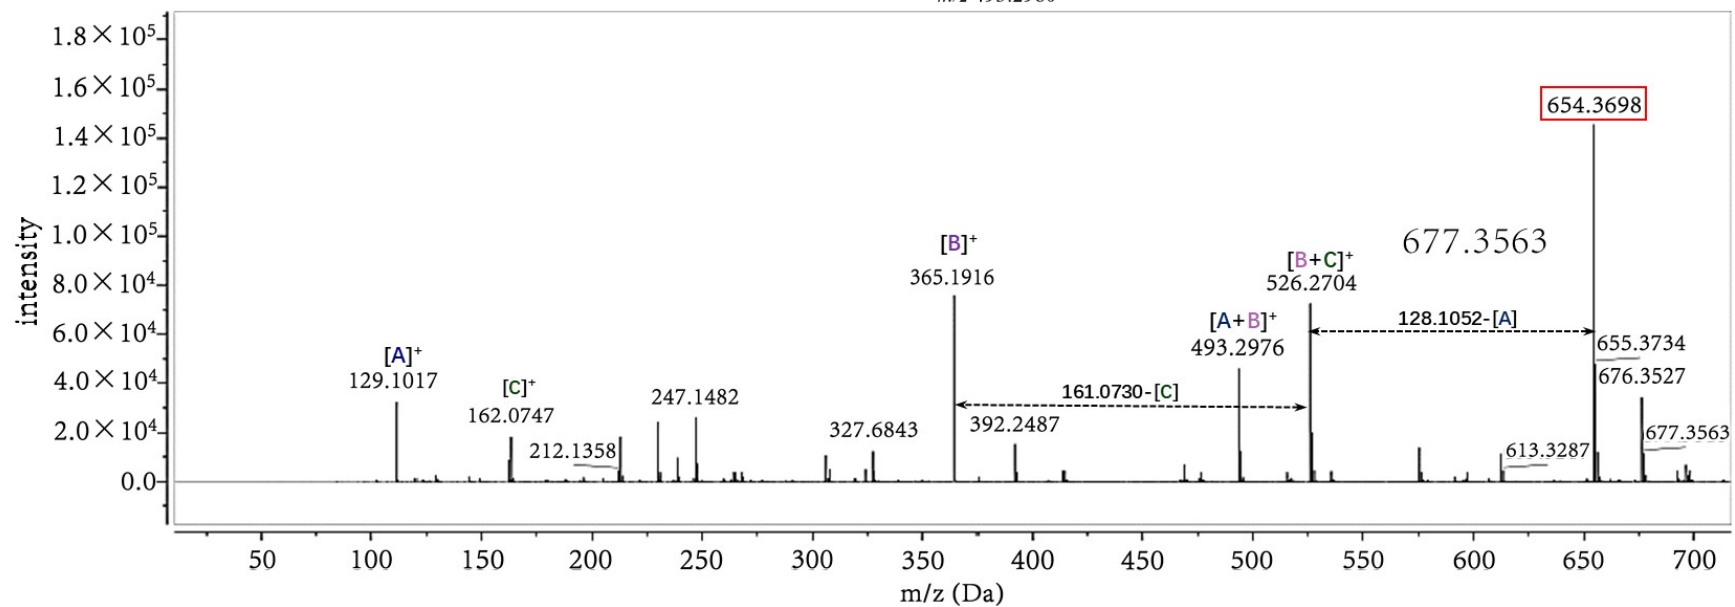

**Fig. S23.** HRMS and fragment ion analysis of **1c**

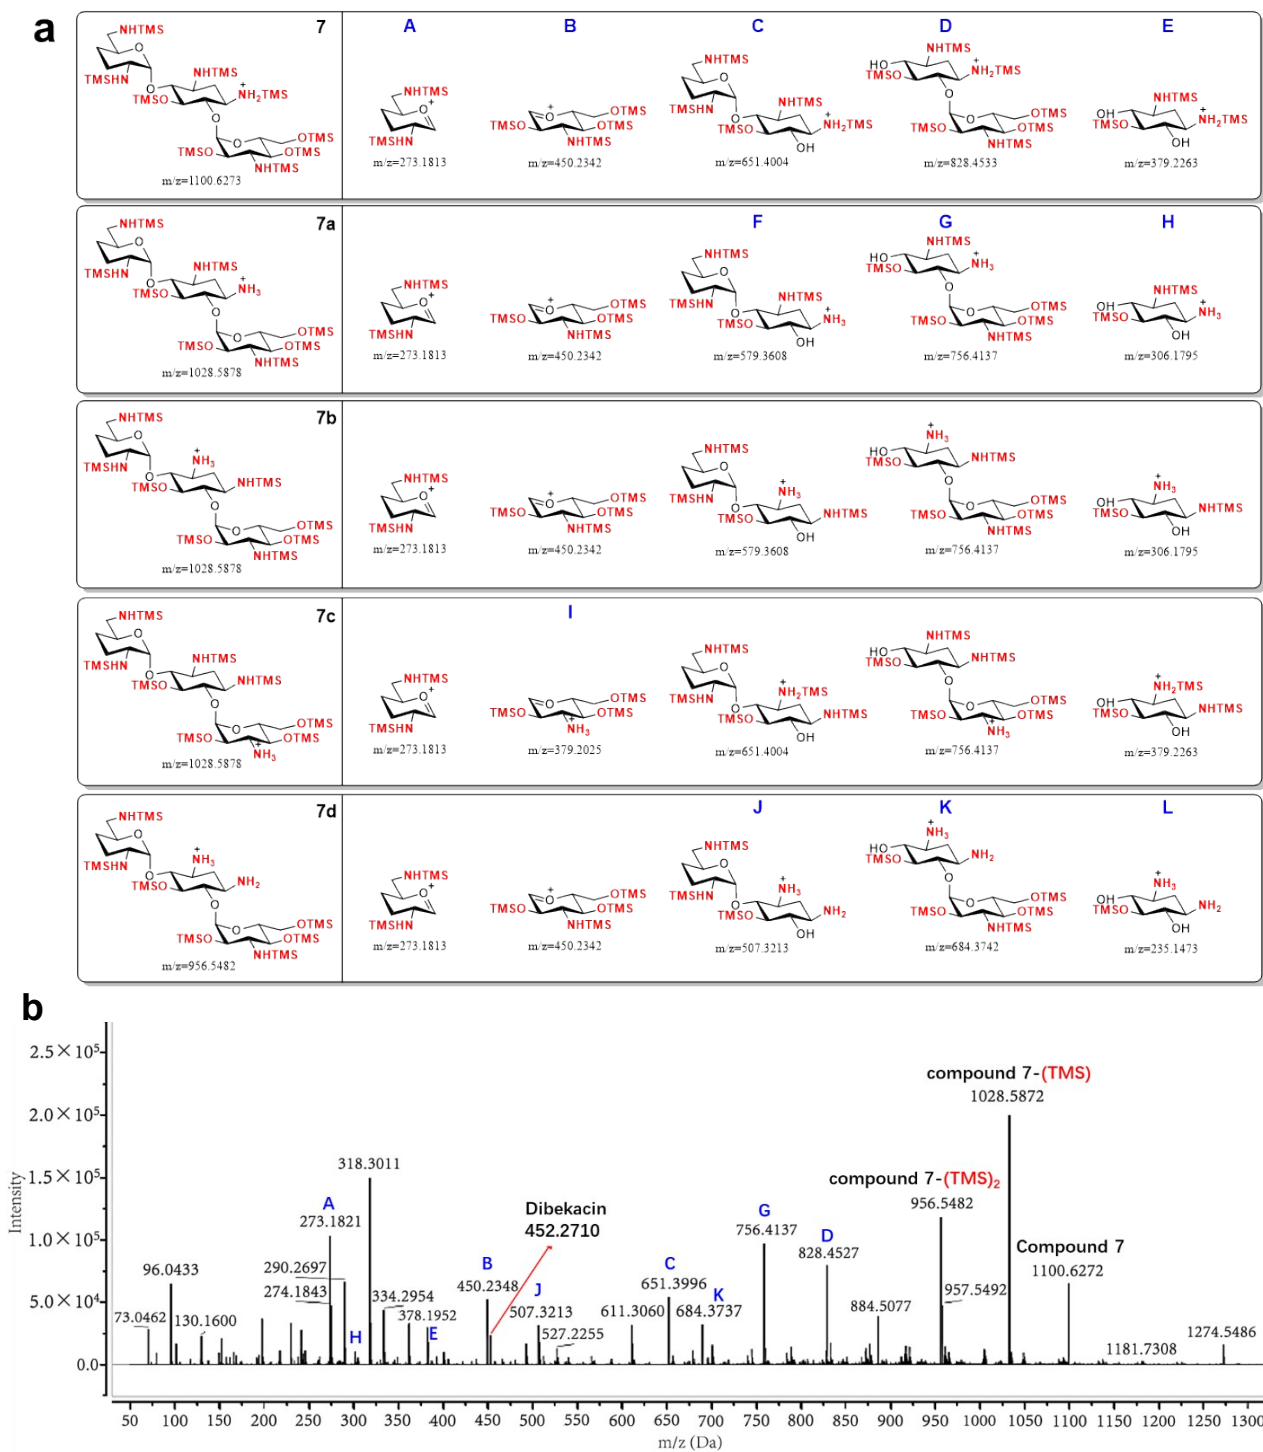

**Fig. S24.** a) The compounds and their mass spectrometry fragments that could potentially be present in the system after redissolving compound 7 in a mixed solvent of acetone and water. b) The mass spectrometry detection spectrum of the system after adding a mixed solvent of acetone and water.

### 3.3 HPLC-ELSD

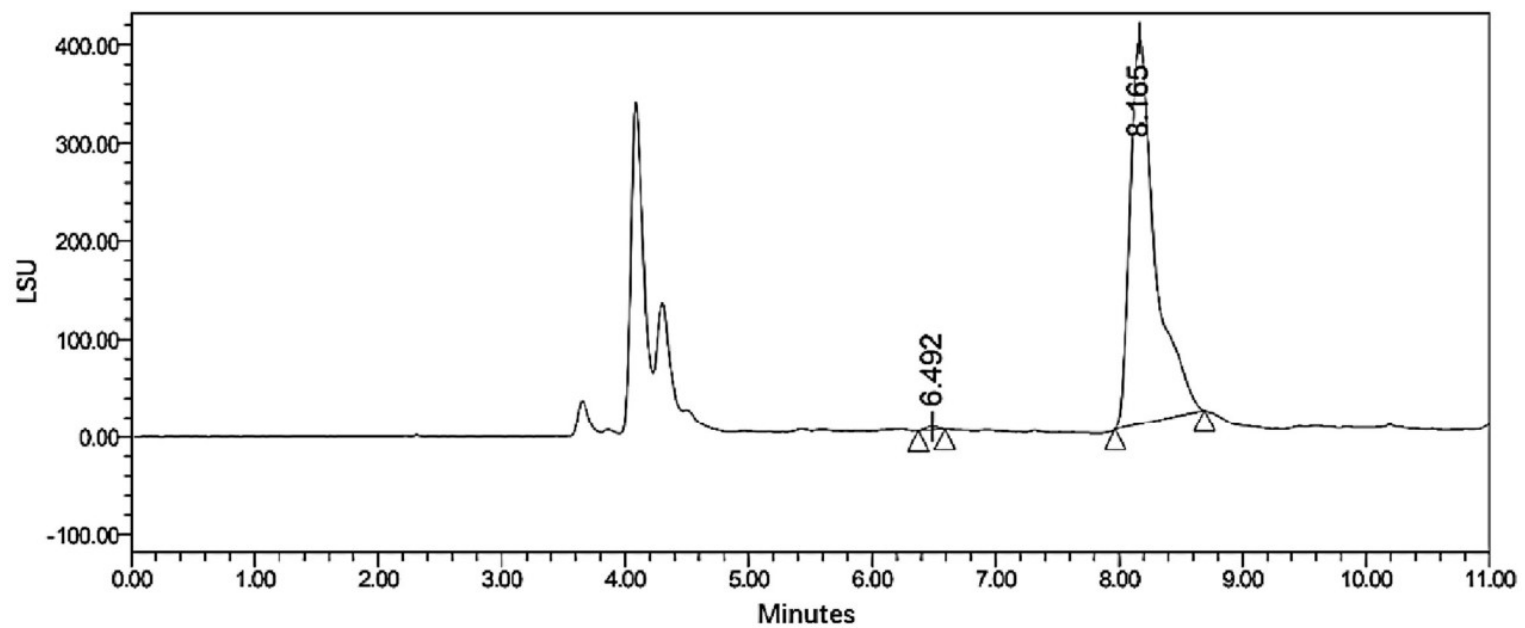

|   | Processing channel | Retention time (minutes) | Area    | % area | Peak height |
|---|--------------------|--------------------------|---------|--------|-------------|
| 1 | ELSD signal        | 6.492                    | 24450   | 0.44   | 3600        |
| 2 | ELSD signal        | 8.165                    | 5593870 | 99.56  | 393791      |

Fig. S25. HPLC-ELSD data of Dibekacin

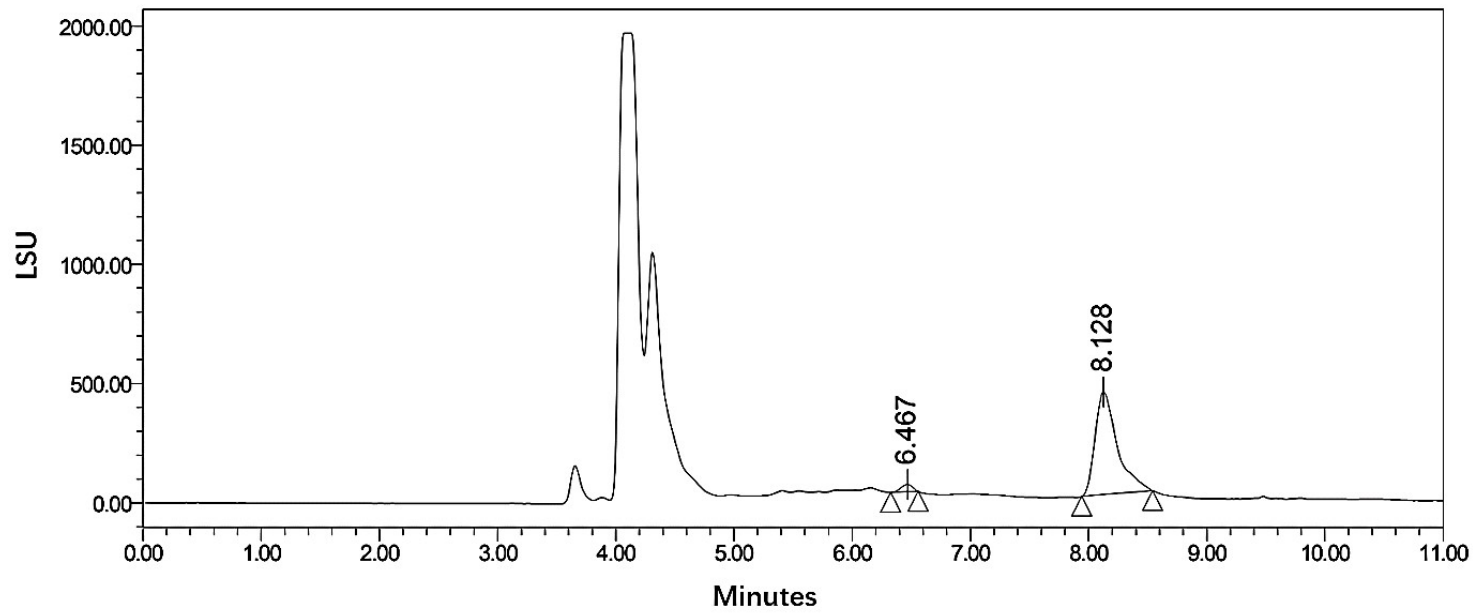

|   | Processing channel | Retention time (minutes) | Area    | % area | Peak height |
|---|--------------------|--------------------------|---------|--------|-------------|
| 1 | ELSD signal        | 6.467                    | 49655   | 0.88   | 6254        |
| 2 | ELSD signal        | 8.128                    | 5593041 | 99.12  | 430943      |

**Fig. S26.** HPLC-ELSD data of recovered Dibekacin



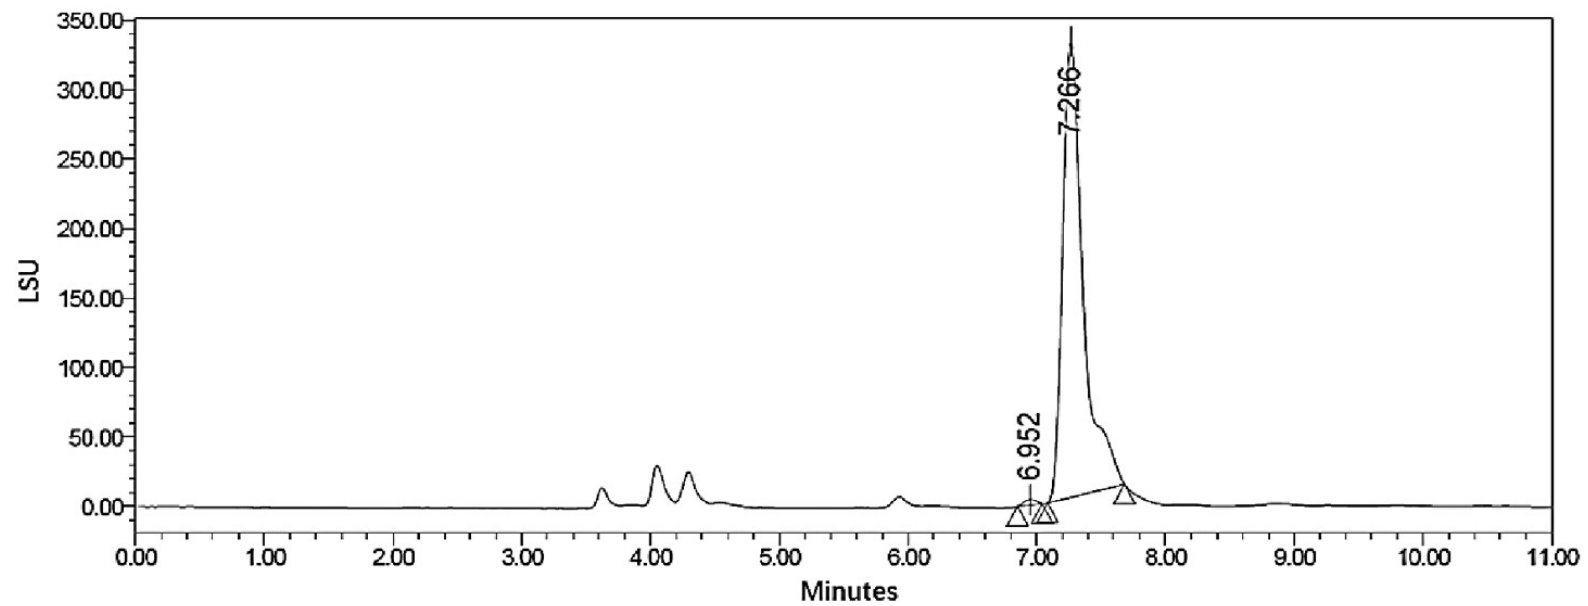

|   | Processing channel | Retention time (minutes) | Area    | % area | Peak height |
|---|--------------------|--------------------------|---------|--------|-------------|
| 1 | ELSD signal        | 6.952                    | 24832   | 0.67   | 3651        |
| 2 | ELSD signal        | 7.266                    | 3667864 | 99.33  | 328180      |

**Fig. S27.** HPLC-ELSD data of Arbekacin

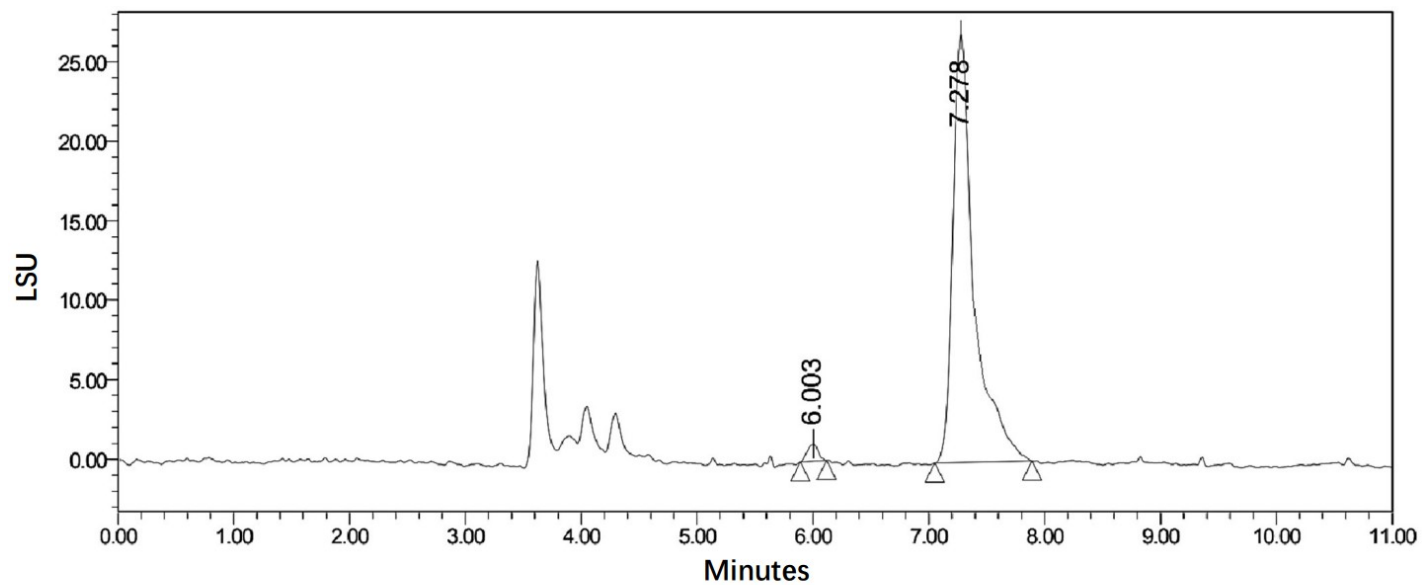

|   | Processing channel | Retention time (minutes) | Area   | % area | Peak height |
|---|--------------------|--------------------------|--------|--------|-------------|
| 1 | ELSD signal        | 6.003                    | 1585   | 0.48   | 214         |
| 2 | ELSD signal        | 7.278                    | 328737 | 99.52  | 26913       |

**Fig. S28.** HPLC-ELSD data of Arbekacin (Table S4 entry 1)

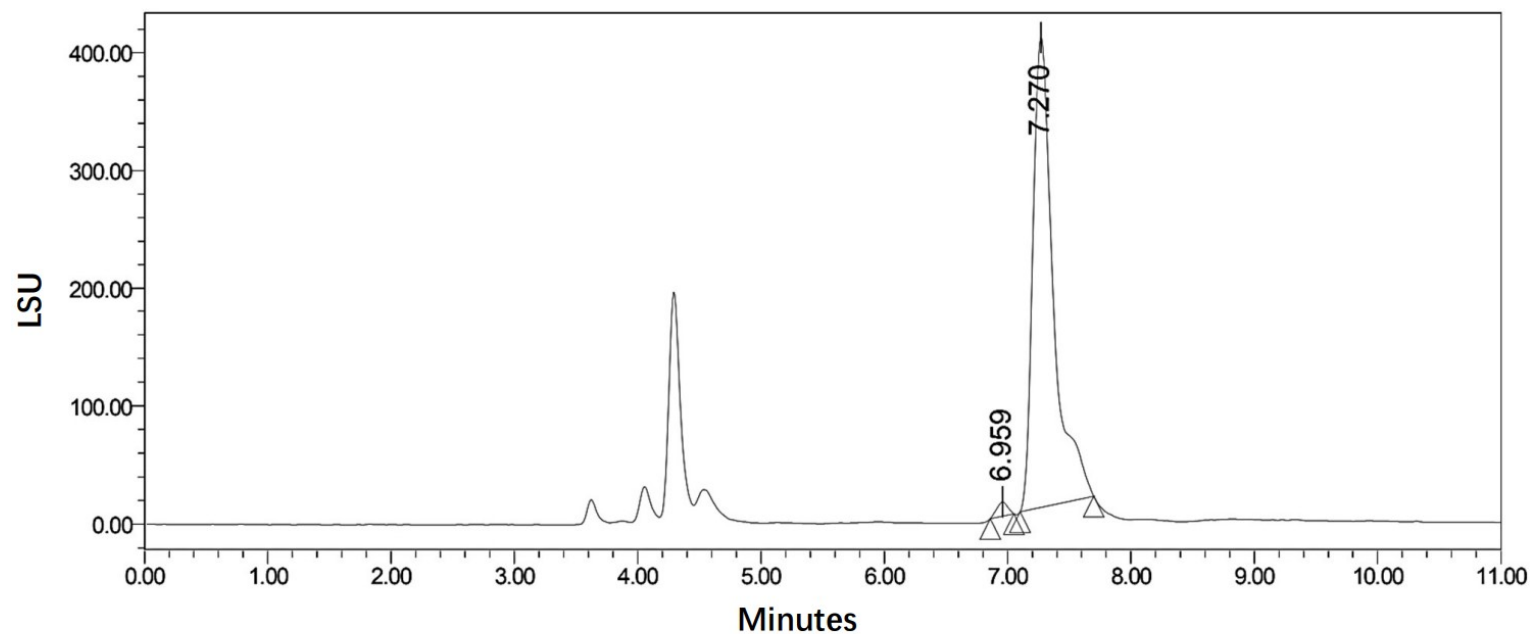

|   | Processing channel | Retention time (minutes) | Area    | % area | Peak height |
|---|--------------------|--------------------------|---------|--------|-------------|
| 1 | ELSD signal        | 6.959                    | 16282   | 0.35   | 2429        |
| 2 | ELSD signal        | 7.270                    | 4635963 | 99.65  | 399423      |

**Fig. S29.** HPLC-ELSD data of Arbekacin (Table S4 entry 2)

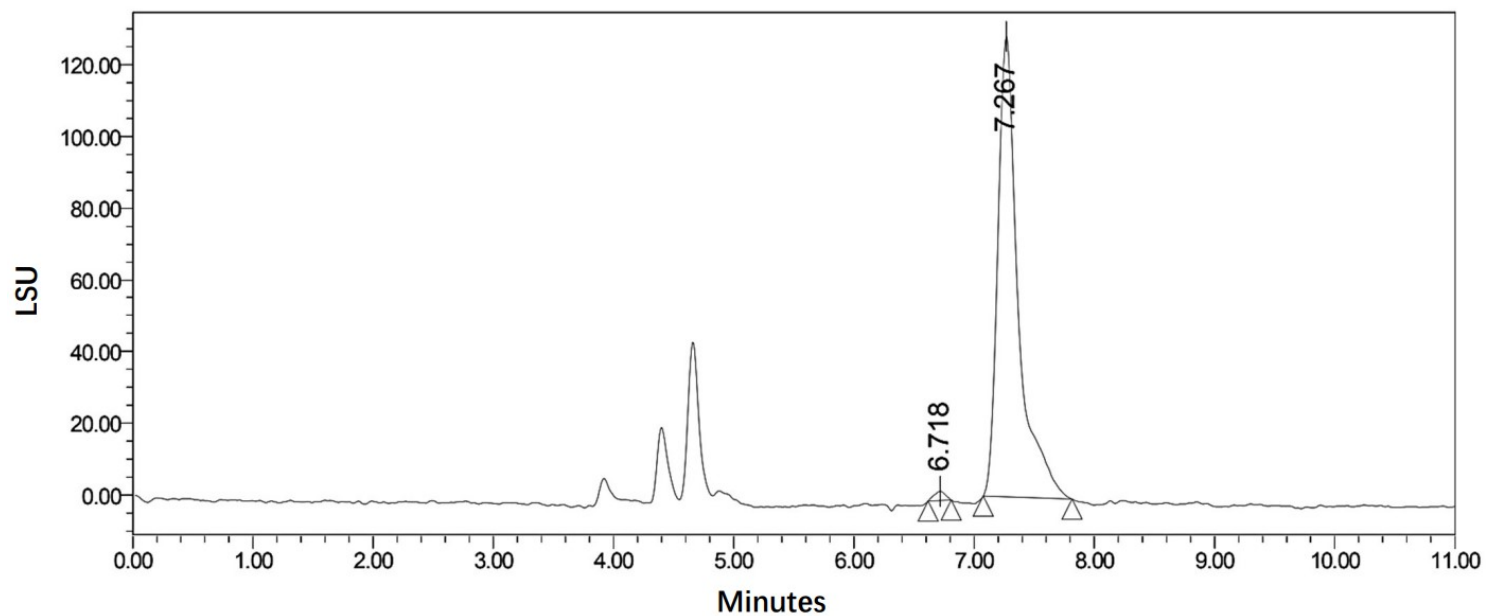

|   | Processing channel | Retention time (minutes) | Area    | % area | Peak height |
|---|--------------------|--------------------------|---------|--------|-------------|
| 1 | ELSD signal        | 6.718                    | 6859    | 0.45   | 1229        |
| 2 | ELSD signal        | 7.267                    | 1517557 | 99.55  | 128354      |

**Fig. S30.** HPLC-ELSD data of Arbekacin (Table S4 entry 3)

## 4. Optical rotary power

**Table S5 The Optical rotary power of the synthesized target compound**

| Experiment | Wavelength<br>/(nm) | Measuring<br>temperature<br>/(°C) | Length of measuring<br>tube<br>/(dm) | Optical rotation<br>measured value<br>/(°) | Concentration <sup>a</sup><br>/(g/100 mL) | Specific rotation<br>/(°) | Average specific rotation<br>/(°) |
|------------|---------------------|-----------------------------------|--------------------------------------|--------------------------------------------|-------------------------------------------|---------------------------|-----------------------------------|
| 1          |                     | 20.06                             |                                      | 0.738                                      |                                           | +74                       |                                   |
| 2          | 589                 | 20.02                             | 1                                    | 0.736                                      | 1.0018                                    | +74                       | +74                               |
| 3          |                     | 20.02                             |                                      | 0.735                                      |                                           | +74                       |                                   |

<sup>a</sup>The solvent is pure water.

The Optical rotary power is calculated by the following formula:

$$[\alpha]_D^t = \frac{100\alpha}{Lc}$$

In the formula,  $[\alpha]$  represents the specific rotation,  $D$  represents the D line of the sodium spectrum,  $t$  represents the temperature at the time of determination,  $L$  represents the length of the measuring tube,  $\alpha$  represents the measured optical rotation, and  $c$  represents the weight of the substance to be measured per 100 mL solution.

## 5. References

- (1) Oláh, J.; Van Alsenoy, C.; Sannigrahi, A. Condensed Fukui Functions Derived from Stockholder Charges: Assessment of Their Performance as Local Reactivity Descriptors. *The Journal of Physical Chemistry A* **2002**, *106* (15), 3885–3890.
